# Supplementary material for: (Si and B)-heterocyclic carbenes and theoretical design of new molecules
Source: Royal Society of Chemistry journal article supplement (doi:10.1039/d2me00138a), 2022-09-14
Supplement: d2me00138a1.pdf [file d2me00138a1.pdf]

## Supporting Information

### (Si and B)-heterocyclic Carbenes and Theoretical Design of New Molecules

Zeqiong Tian,<sup>a</sup> Congjie Zhang,<sup>\*a</sup> Zhipeng Pei,<sup>b</sup> Jinxia Liang<sup>\*c</sup> and Yirong Mo<sup>\*d</sup>

#### Table of Contents

|                                                                                                                                                                                                                                                                                                                    |       |
|--------------------------------------------------------------------------------------------------------------------------------------------------------------------------------------------------------------------------------------------------------------------------------------------------------------------|-------|
| <b>Scheme 1S.</b> The two paths for the isomerization of SiBHCs ( <b>a</b> ) to their linear isomers ( <b>b</b> ).....                                                                                                                                                                                             | S2    |
| <b>Figure 1S.</b> Optimized geometries of the possible structures of SiBHCs and their linear isomers. Bond lengths (in plain, in Å), relative energies (in bold, in kcal/mol) and the smallest vibrational frequencies (in italic, in cm <sup>-1</sup> ) at M06-2X/6-311G** level.....                             | S3-S6 |
| <b>Figure 2S.</b> The $\pi$ delocalized orbitals covered the three-membered ring CCB of <b>Ai</b> (i=1-15).....                                                                                                                                                                                                    | S7    |
| <b>Figure 3S.</b> Selected bond lengths of Ag-C and Si-C in <b>B1</b> from ab initio Molecular Dynamics (AIMD) simulations at (a) $T=298$ K and (b) 673 K for 8000 fs, and the energy evolution of <b>B1</b> within 8000 fs from ab initio Molecular Dynamics (AIMD) simulations at (c) $T=298$ and (d) 673 K..... | S7    |
| <b>Table 1S.</b> Symmetry (Symm.), Energy of HOMO ( $E_{\text{HOMO}}$ , in a.u.) and LUMO ( $E_{\text{LUMO}}$ , in a.u.), Energy Gaps ( $E_{\text{gap}}$ , in eV) of <b>Ai</b> (i=1-15).....                                                                                                                       | S8    |
| <b>Table 2S.</b> The NICS(0) and NICS(1) values (in ppm) at the centers of the three-membered rings (CCB) of <b>Ai</b> (i=1-15). And, electron density ( $\rho$ ) and Laplacian values ( $\nabla^2\rho$ ) of the inverted C=C bonds in <b>Ai</b> (i=1-15) at M06-2X/6-311G** level.....                            | S9    |
| <b>Table 3S.</b> Bonding energies with ZPEs ( $E_{\text{b}}$ , in kcal/mol) of the complexes <b>Bi</b> (i=1-15) and $\text{LAgC}\equiv\text{CH}$ (L= CO, NHC) formed by CO, NHC and $\text{AgC}\equiv\text{CH}$ at M06-2X/6-311G** level.....                                                                      | S9    |
| <b>Table 4S.</b> Bond lengths (d1 and d2, in Å) of the transition structures ( <b>TS</b> ) of the Diels-Alder reactions of <b>Ai</b> (i=5-13) with butadiene at M06-2X/6-311G** level .....                                                                                                                        | S10   |
| <b>Table 5S.</b> Bond lengths (d, in Å) and WBIs of C <sub>1</sub> -C <sub>2</sub> bond of the products of the Diels-Alder reactions of <b>Ai</b> (i=5-13) with butadiene at M06-2X/6-311G** level.....                                                                                                            | S10   |
| Cartesian coordinates, electronic energy (E, in a.u.) and the smallest vibrational frequency ( $\nu$ , in cm <sup>-1</sup> ) for all the stable molecules calculated at the M06-2X/6-311G** level.....                                                                                                             | S11   |

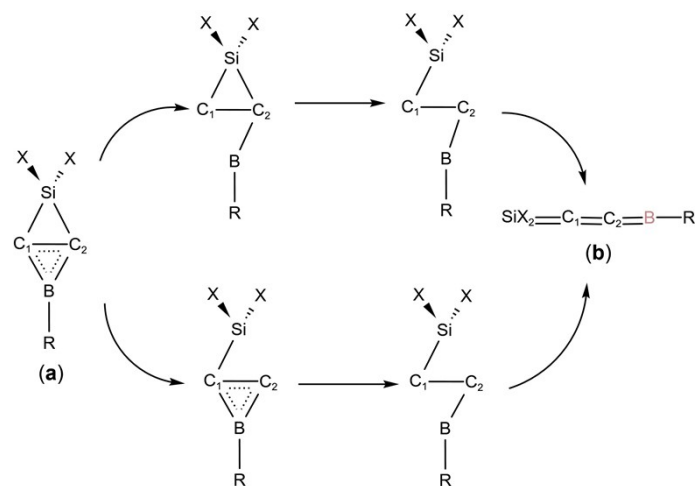

**Scheme 1S.** The two paths for the isomerization of SiBHCs **(a)** to their linear isomers **(b)**.

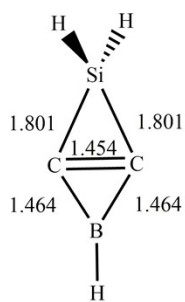

**A1 0.00 268.15**

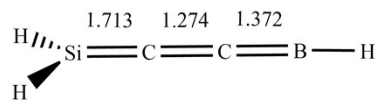

**A1-1 30.25 147.89i**

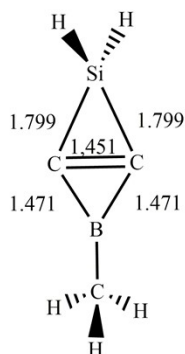

**A2 0.00 26.62**

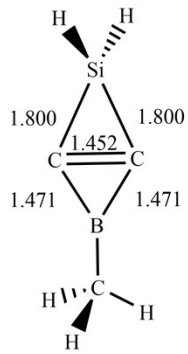

**A2-1 0.03 48.65i**

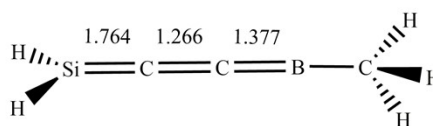

**A2-2 26.66 59.59i**

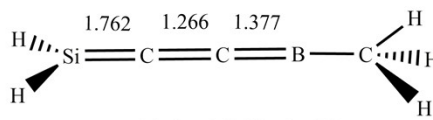

**A2-3 26.69 87.83**

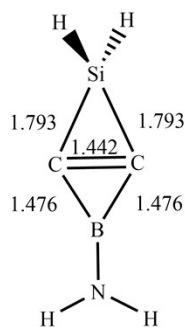

**A3 0.00 154.99**

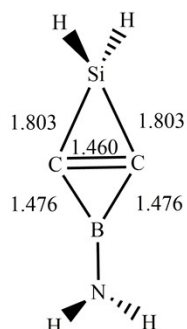

**A3-1 17.63 597.72i**

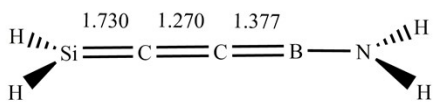

**A3-2 41.04 1246.46i**

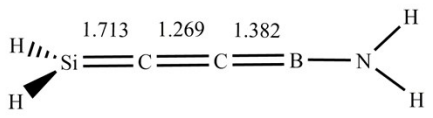

**A3-3 23.78 196.09i**

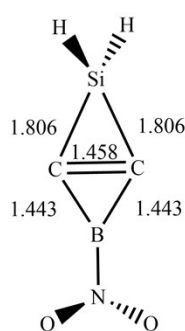

**A4 0.00 80.24**

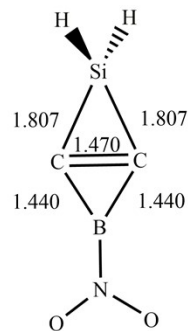

**A4-1 3.43 87.63i**

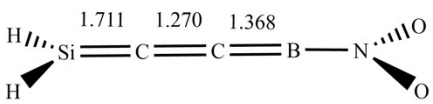

**A4-2 32.31 52.54**

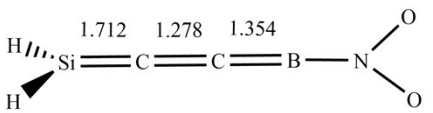

**A4-3 42.07 396.48i**

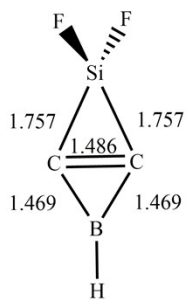

**A5 0.00 169.58**

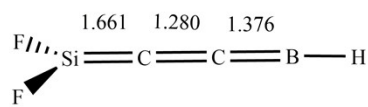

**A5-1 48.96 253.28i**

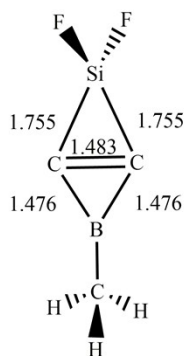

**A6 0.00 32.94**

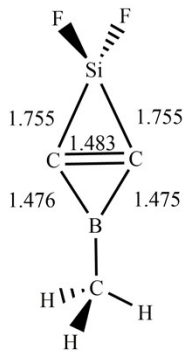

**A6-1 0.01 39.69i**

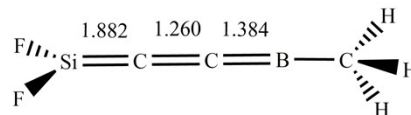

**A6-2 35.94 36.71**

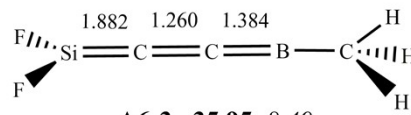

**A6-3 35.95 8.49**

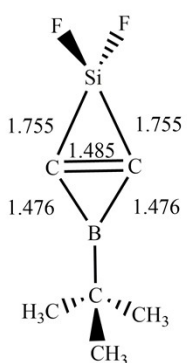

**A7 0.00 17.58**

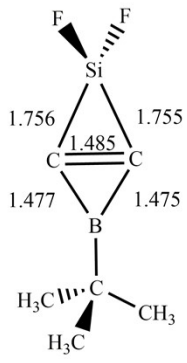

**A7-1 0.06 14.63i**

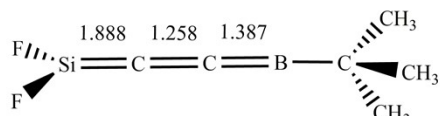

**A7-2 36.31 10.43**

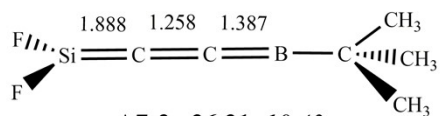

**A7-3 36.31 10.43**

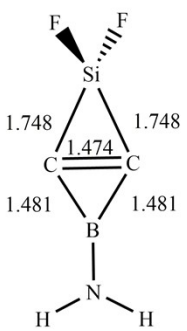

**A8 0.00 99.13**

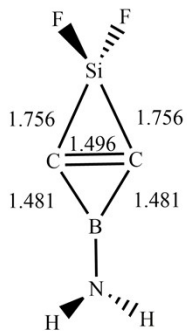

**A8-1 20.12 646.12i**

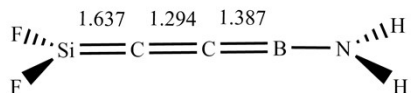

**A8-2 72.67 277.79i**

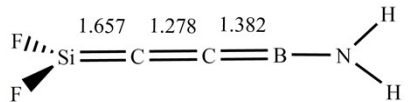

**A8-3 43.92 268.73i**

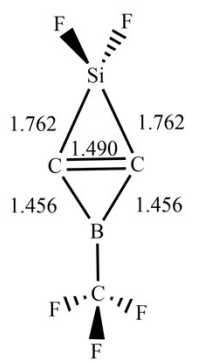

**A9 0.00 13.37**

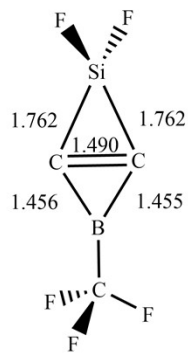

**A9-1 0.03 7.92i**

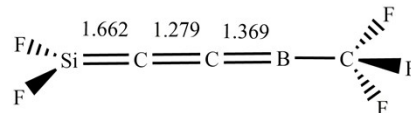

**A9-2 50.70 206.87i**

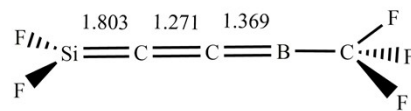

**A9-3 46.02 6.96**

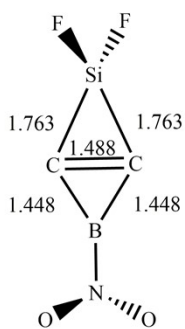

**A10 0.00 57.11**

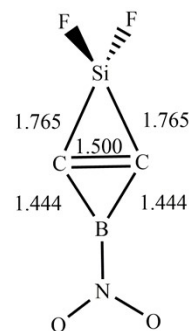

**A10-1 3.65 62.02i**

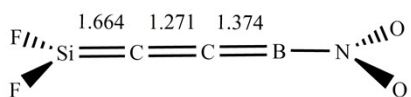

**A10-2 47.52 157.31i**

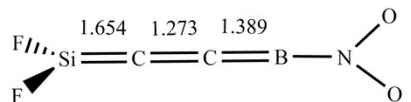

**A10-3 71.18 172.02i**

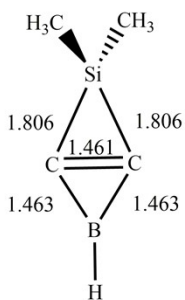

**A11 0.00 142.03**

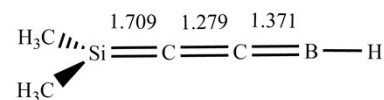

**A11-1 35.39 45.67**

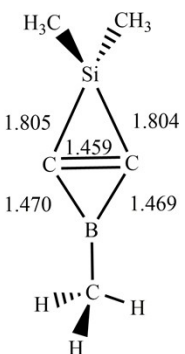

**A12 0.00 42.73**

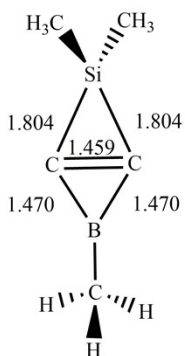

**A12-1 0.01 36.27**

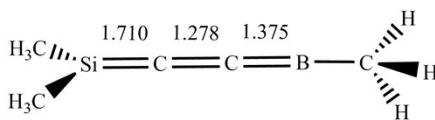

**A12-2 33.49 48.79i**

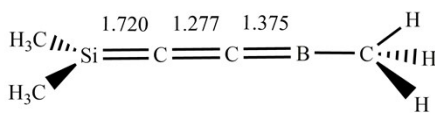

**A12-3 33.44 53.98**

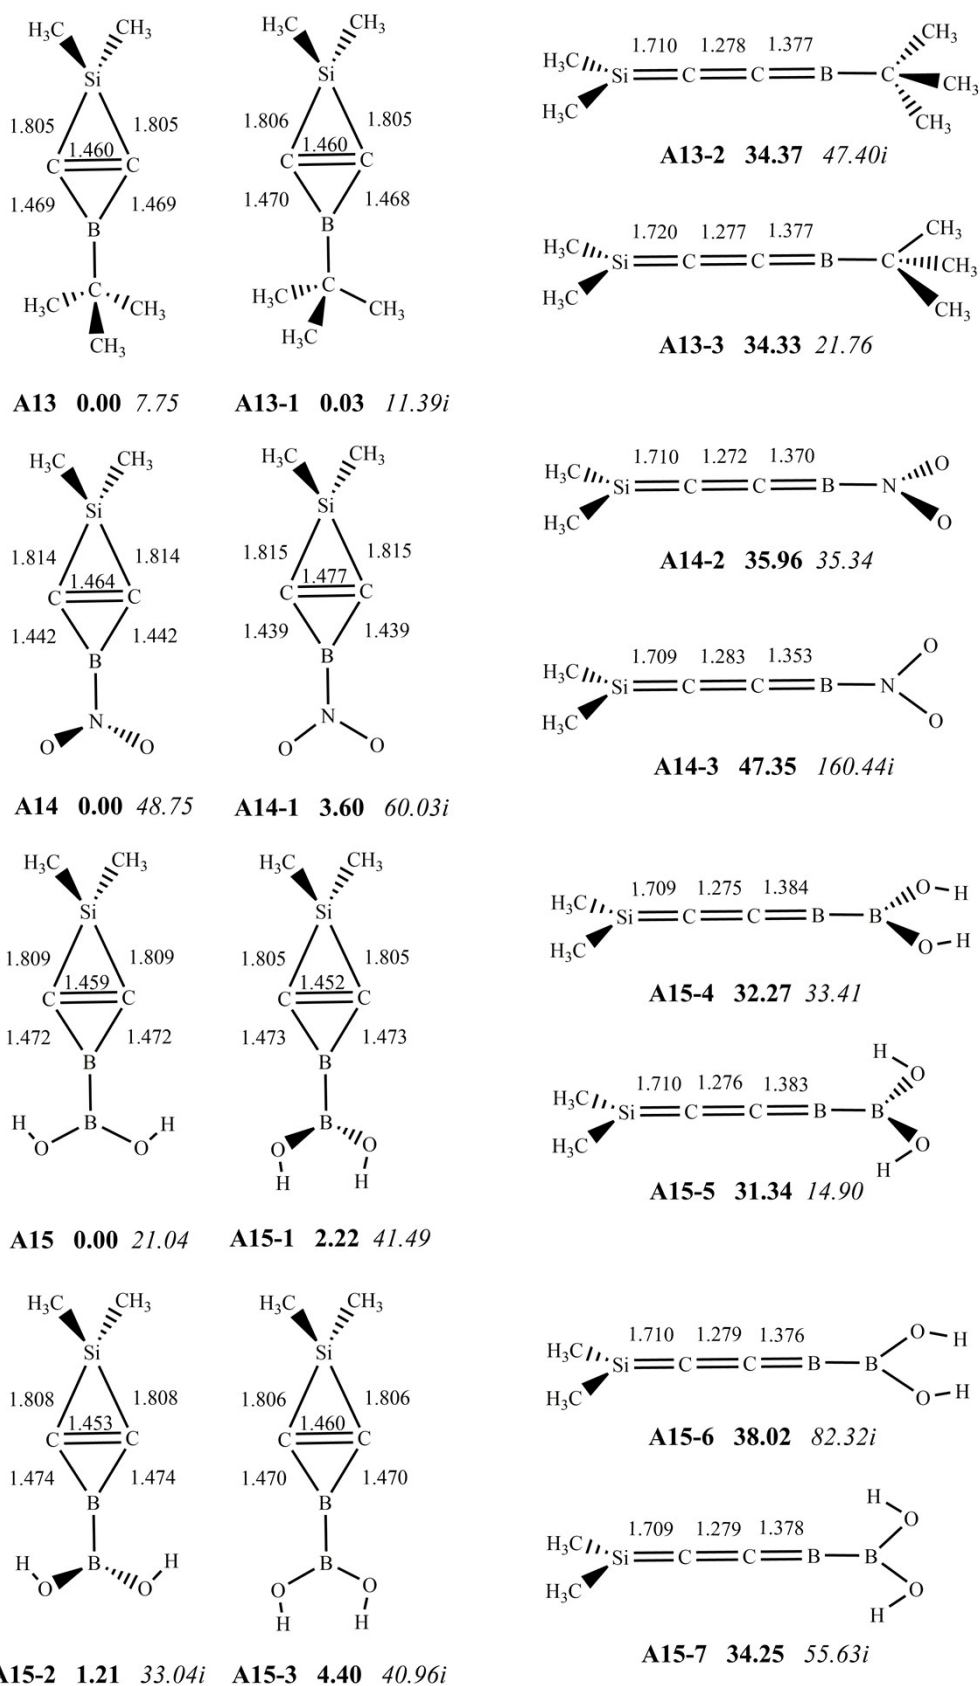

**Figure 1S.** Optimized geometries of the possible structures of SiBHCs and their linear isomers. Bond lengths (in plain, in Å), relative energies (in bold, in kcal/mol) and the smallest vibrational frequencies (in italic, in  $\text{cm}^{-1}$ ) at M06-2X/6-311G\*\* level.

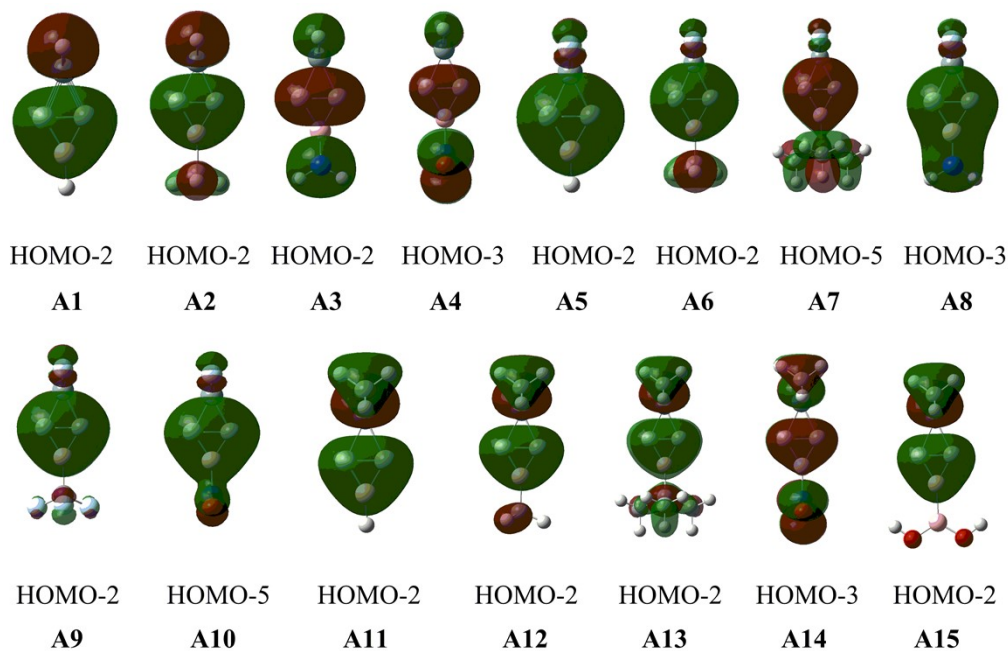

**Figure 2S.** The  $\pi$  delocalized orbitals covered the three-membered ring CCB of **A<sub>i</sub>** ( $i=1-15$ ).

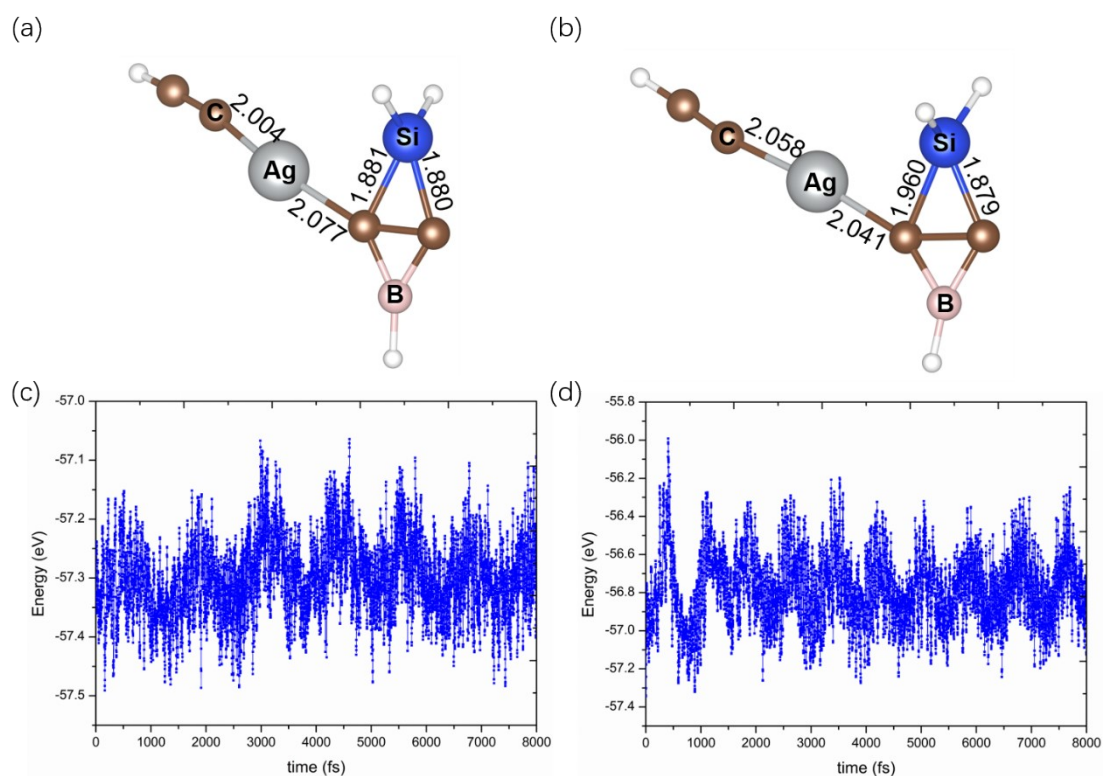

**Figure 3S.** Selected bond lengths of Ag-C and Si-C in **B1** from ab initio Molecular Dynamics (AIMD) simulations at (a)  $T=298$  K and (b)  $673$  K for  $8000$  fs, and the energy evolution of **B1** within  $8000$  fs from ab initio Molecular Dynamics (AIMD) simulations at (c)  $T=298$  and (d)  $673$  K.

**Table 1S.** Symmetry (Symm.), Energy of HOMO ( $E_{\text{HOMO}}$ , in a.u.) and LUMO ( $E_{\text{LUMO}}$ , in a.u.), Energy Gaps ( $E_{\text{gap}}$ , in eV) of **Ai** (i=1-15).

| Species    | Symm.    | $E_{\text{HOMO}}$ | $E_{\text{LUMO}}$ | $E_{\text{gap}}$ |
|------------|----------|-------------------|-------------------|------------------|
| <b>A1</b>  | $C_{2v}$ | -0.32146          | 0.00651           | 8.92             |
| <b>A2</b>  | $C_s$    | -0.31501          | 0.01316           | 8.93             |
| <b>A3</b>  | $C_{2v}$ | -0.31325          | 0.02097           | 9.09             |
| <b>A4</b>  | $C_{2v}$ | -0.35298          | -0.04246          | 8.45             |
| <b>A5</b>  | $C_{2v}$ | -0.34791          | -0.01970          | 8.93             |
| <b>A6</b>  | $C_s$    | -0.34017          | -0.01214          | 8.93             |
| <b>A7</b>  | $C_s$    | -0.33467          | -0.01376          | 8.73             |
| <b>A8</b>  | $C_{2v}$ | -0.33942          | -0.00142          | 9.20             |
| <b>A9</b>  | $C_s$    | -0.36962          | -0.04077          | 8.95             |
| <b>A10</b> | $C_{2v}$ | -0.37529          | -0.05218          | 8.79             |
| <b>A11</b> | $C_{2v}$ | -0.30743          | 0.01888           | 8.88             |
| <b>A12</b> | $C_s$    | -0.30198          | 0.02412           | 8.87             |
| <b>A13</b> | $C_s$    | -0.30050          | 0.02114           | 8.75             |
| <b>A14</b> | $C_{2v}$ | -0.33926          | -0.02468          | 8.56             |
| <b>A15</b> | $C_{2v}$ | -0.30542          | -0.00288          | 8.23             |



**Table 2S.** The NICS(0) and NICS(1) values (in ppm) at the centers of the three-membered rings (CCB) of **Ai** (i=1-15). And, electron density ( $\rho$ ) and Laplacian values ( $\nabla^2\rho$ ) of the inverted C=C bonds in **Ai** (i=1-15) at M06-2X/6-311G\*\* level.

| Species    | NICS(0) | NICS(1) | $\rho$ | $\nabla^2\rho$ |
|------------|---------|---------|--------|----------------|
| <b>A1</b>  | -34.57  | -21.59  | 0.27   | -0.39          |
| <b>A2</b>  | -30.95  | -19.37  | 0.27   | -0.40          |
| <b>A3</b>  | -20.50  | -17.54  | 0.27   | -0.43          |
| <b>A4</b>  | -29.42  | -19.90  | 0.27   | -0.39          |
| <b>A5</b>  | -37.71  | -17.98  | 0.25   | -0.32          |
| <b>A6</b>  | -33.68  | -15.09  | 0.25   | -0.32          |
| <b>A7</b>  | -32.29  | -13.89  | 0.25   | -0.32          |
| <b>A8</b>  | -21.73  | -11.13  | 0.26   | -0.35          |
| <b>A9</b>  | -34.33  | -15.52  | 0.25   | -0.31          |
| <b>A10</b> | -32.22  | -15.64  | 0.25   | -0.31          |
| <b>A11</b> | -36.86  | -20.15  | 0.26   | -0.37          |
| <b>A12</b> | -33.42  | -17.77  | 0.26   | -0.38          |
| <b>A13</b> | -32.20  | -17.27  | 0.26   | -0.37          |
| <b>A14</b> | -31.57  | -18.57  | 0.26   | -0.37          |
| <b>A15</b> | -38.44  | -19.41  | 0.26   | -0.38          |

**Table 3S.** Bonding energies with ZPEs ( $E_b$ , in kcal/mol) of the complexes **Bi** (i=1-15) and LAgC $\equiv$ CH (L= CO, NHC) formed by CO, NHC and AgC $\equiv$ CH at M06-2X/6-311G\*\* level.

| Species   | $E_b$  | Species             | $E_b$  |
|-----------|--------|---------------------|--------|
| <b>B1</b> | -27.58 | <b>B10</b>          | -18.94 |
| <b>B2</b> | -28.77 | <b>B11</b>          | -31.43 |
| <b>B3</b> | -29.75 | <b>B12</b>          | -32.44 |
| <b>B4</b> | -23.24 | <b>B13</b>          | -32.69 |
| <b>B5</b> | -23.13 | <b>B14</b>          | -27.07 |
| <b>B6</b> | -24.49 | <b>B15</b>          | -32.20 |
| <b>B7</b> | -26.20 | CO-AgC $\equiv$ CH  | -18.45 |
| <b>B8</b> | -25.79 | NHC-AgC $\equiv$ CH | -45.20 |
| <b>B9</b> | -20.82 |                     |        |

**Table 4S.** Bond lengths (d1 and d2, in Å) of the transition structures (TS) of the Diels-Alder reactions of **Ai** (i=5-13) with butadiene at M06-2X/6-311G\*\* level.

| TS                           | d1    | d2    | TS                          | d1    | d2    |
|------------------------------|-------|-------|-----------------------------|-------|-------|
| <b>TS<sub>A5-endo</sub></b>  | 2.323 | 2.323 | <b>TS<sub>A5-exo</sub></b>  | 2.313 | 2.313 |
| <b>TS<sub>A6-endo</sub></b>  | 2.322 | 2.323 | <b>TS<sub>A6-exo</sub></b>  | 2.316 | 2.311 |
| <b>TS<sub>A7-endo</sub></b>  | 2.311 | 2.329 | <b>TS<sub>A7-exo</sub></b>  | 2.327 | 2.306 |
| <b>TS<sub>A8-endo</sub></b>  | 2.330 | 2.330 | <b>TS<sub>A8-exo</sub></b>  | 2.336 | 2.336 |
| <b>TS<sub>A9-endo</sub></b>  | 2.348 | 2.350 | <b>TS<sub>A9-exo</sub></b>  | 2.338 | 2.334 |
| <b>TS<sub>A10-endo</sub></b> | 2.378 | 2.378 | <b>TS<sub>A10-exo</sub></b> | 2.354 | 2.354 |
| <b>TS<sub>A11-endo</sub></b> | 2.300 | 2.300 | <b>TS<sub>A11-exo</sub></b> | 2.285 | 2.285 |
| <b>TS<sub>A12-endo</sub></b> | 2.305 | 2.302 | <b>TS<sub>A12-exo</sub></b> | 2.274 | 2.299 |
| <b>TS<sub>A13-endo</sub></b> | 2.321 | 2.283 | <b>TS<sub>A13-exo</sub></b> | 2.260 | 2.318 |

**Table 5S.** Bond lengths (d, in Å) and WBIs of C<sub>1</sub>-C<sub>2</sub> bond of the products of the Diels-Alder reactions of **Ai** (i=5-13) with butadiene at M06-2X/6-311G\*\* level.

| Products               | d     | WBI  |
|------------------------|-------|------|
| <b>P<sub>A5</sub></b>  | 1.794 | 0.73 |
| <b>P<sub>A6</sub></b>  | 1.789 | 0.75 |
| <b>P<sub>A7</sub></b>  | 1.789 | 0.75 |
| <b>P<sub>A8</sub></b>  | 1.777 | 0.78 |
| <b>P<sub>A9</sub></b>  | 1.826 | 0.70 |
| <b>P<sub>A10</sub></b> | 1.828 | 0.70 |
| <b>P<sub>A11</sub></b> | 1.705 | 0.78 |
| <b>P<sub>A12</sub></b> | 1.703 | 0.79 |
| <b>P<sub>A13</sub></b> | 1.708 | 0.79 |

Cartesian coordinates, electronic energy (E, in a.u.) and the smallest vibrational frequency ( $\nu$ , in  $\text{cm}^{-1}$ ) for all the stable molecules calculated at the M06-2X/6-311G\*\* level.

**A1**

E= -392.20164  
 $\nu$ = 268.15  
 B 0.000000 0.000000 -1.834183  
 C 0.000000 0.727179 -0.563128  
 C 0.000000 -0.727179 -0.563128  
 H -1.234889 0.000000 1.878187  
 H 1.234889 0.000000 1.878187  
 Si 0.000000 0.000000 1.084306  
 H 0.000000 0.000000 -3.008200

**A2**

E= -431.52438  
 $\nu$ = 18.74  
 B 0.016782 -1.158778 0.000000  
 C 0.004866 0.120829 0.725425  
 C 0.004866 0.120829 -0.725425  
 Si -0.005352 1.767484 0.000000  
 C 0.004866 -2.706766 0.000000  
 H -1.035115 -3.049027 0.000000  
 H 0.479833 -3.121035 -0.890098  
 H 0.479833 -3.121035 0.890098  
 H 1.222472 2.573531 0.000000  
 H -1.243608 2.557325 0.000000

**A3**

E= -447.60660  
 $\nu$ = 154.99  
 B 0.000000 0.000000 -1.200253  
 C 0.000000 0.720808 0.088124  
 C 0.000000 -0.720808 0.088124  
 Si 0.000000 0.000000 1.730105  
 N 0.000000 0.000000 -2.586387  
 H 0.000000 0.849638 -3.125067  
 H 0.000000 -0.849638 -3.125067  
 H -1.228149 0.000000 2.538579  
 H 1.228149 0.000000 2.538579

**A4**

E= -596.69892  
 $\nu$ = 80.24  
 B 0.000000 0.000000 -0.347487  
 C 0.729058 0.000000 0.897966  
 C -0.729058 0.000000 0.897966  
 Si 0.000000 0.000000 2.549821  
 N 0.000000 0.000000 -1.851009  
 O 0.000000 1.081770 -2.402090  
 O 0.000000 -1.081770 -2.402090  
 H 0.000000 1.242071 3.327428  
 H 0.000000 -1.242071 3.327428

**A5**

E= -590.81289  
 $\nu$ = 169.58  
 B 0.000000 0.000000 -2.451281  
 C 0.000000 0.742818 -1.184329  
 C 0.000000 -0.742818 -1.184329  
 Si 0.000000 0.000000 0.407710  
 H 0.000000 0.000000 -3.623659  
 F 1.265343 0.000000 1.354671  
 F -1.265343 0.000000 1.354671

**A6**

E= -630.13663  
 $\nu$ = 32.94  
 B 0.009120 -1.881477 0.000000  
 C 0.005095 -0.605530 0.741547  
 C 0.005095 -0.605530 -0.741547  
 Si 0.005095 0.984735 0.000000  
 F 1.267757 1.938727 0.000000  
 F -1.258698 1.937292 0.000000  
 C -0.016452 -3.425566 0.000000  
 H 0.450617 -3.845900 -0.891072  
 H -1.062125 -3.751516 0.000000  
 H 0.450617 -3.845900 0.891072

**A7**

E= -748.04382  
 $\nu$ = 17.58  
 B 0.079321 -0.704928 0.000000  
 C -0.139567 0.552027 0.742365  
 C -0.139567 0.552027 -0.742365  
 Si -0.422601 2.117200 0.000000  
 F 0.651317 3.279731 0.000000  
 F -1.834614 2.832004 0.000000  
 C 0.410430 -2.223908 0.000000  
 C -0.139567 -2.907241 1.259847  
 H 0.153397 -3.962118 1.273186  
 H 0.244449 -2.432782 2.165749  
 H -1.231130 -2.862172 1.293292  
 C -0.139567 -2.907241 -1.259847  
 H 0.244449 -2.432782 -2.165749  
 H 0.153397 -3.962118 -1.273186  
 H -1.231130 -2.862172 -1.293292  
 C 1.951446 -2.321128 0.000000  
 H 2.383902 -1.849723 -0.886326  
 H 2.383902 -1.849723 0.886326  
 H 2.246587 -3.375398 0.000000

**A8**

E= -646.22157  
 $\nu$ = 99.13  
 B 0.000000 0.000000 -1.915022  
 C 0.000000 0.736942 -0.630561  
 C 0.000000 -0.736942 -0.630561  
 Si 0.000000 0.000000 0.954044  
 F -1.257991 0.000000 1.918241  
 F 1.257991 0.000000 1.918241  
 N 0.000000 0.000000 -3.295826  
 H 0.000000 -0.848913 -3.836165  
 H 0.000000 0.848913 -3.836165

**A9**

E= -927.85215  
 $\nu$ = 13.37  
 B -0.081265 -0.695945 0.000000  
 C 0.114823 0.539317 0.744879  
 C 0.114823 0.539317 -0.744879  
 Si 0.372880 2.114774 0.000000  
 F 1.776408 2.833213 0.000000  
 F -0.727668 3.243657 0.000000  
 C -0.381464 -2.251857 0.000000

|   |           |           |           |
|---|-----------|-----------|-----------|
| F | -1.712064 | -2.449429 | 0.000000  |
| F | 0.114823  | -2.874153 | -1.077690 |
| F | 0.114823  | -2.874153 | 1.077690  |

**A10**

E= -795.30656

v= 57.11

|    |           |           |           |
|----|-----------|-----------|-----------|
| B  | 0.000000  | 0.000000  | -1.100869 |
| C  | 0.743842  | 0.000000  | 0.141053  |
| C  | -0.743842 | 0.000000  | 0.141053  |
| Si | 0.000000  | 0.000000  | 1.739146  |
| F  | 0.000000  | 1.269902  | 2.669487  |
| F  | 0.000000  | -1.269902 | 2.669487  |
| N  | 0.000000  | 0.000000  | -2.601624 |
| O  | 0.000000  | 1.082919  | -3.148483 |
| O  | 0.000000  | -1.082919 | -3.148483 |

**A11**

E= -470.84664

v= 142.03

|    |           |           |           |
|----|-----------|-----------|-----------|
| B  | 0.000000  | 0.000000  | -2.536862 |
| C  | 0.730491  | 0.000000  | -1.268741 |
| C  | -0.730491 | 0.000000  | -1.268741 |
| Si | 0.000000  | 0.000000  | 0.383414  |
| C  | 0.000000  | 1.563265  | 1.388521  |
| H  | 0.883694  | 1.605437  | 2.029482  |
| H  | 0.000000  | 2.437049  | 0.736552  |
| H  | -0.883694 | 1.605437  | 2.029482  |
| C  | 0.000000  | -1.563265 | 1.388521  |
| H  | 0.883694  | -1.605437 | 2.029482  |
| H  | -0.883694 | -1.605437 | 2.029482  |
| H  | 0.000000  | -2.437049 | 0.736552  |
| H  | 0.000000  | 0.000000  | -3.711884 |

**A12**

E= -510.16862

v= 42.73

|    |           |           |           |
|----|-----------|-----------|-----------|
| B  | -0.522571 | -1.881224 | 0.000000  |
| C  | -0.886868 | -0.458241 | 0.000000  |
| C  | 0.519744  | -0.844504 | 0.000000  |
| Si | 0.253026  | 0.940289  | 0.000000  |
| C  | 0.519744  | 1.913616  | 1.562082  |
| H  | -0.162030 | 2.765944  | 1.605252  |
| H  | 0.346531  | 1.285205  | 2.435818  |
| H  | 1.541333  | 2.297754  | 1.606187  |
| C  | 0.519744  | 1.913616  | -1.562082 |
| H  | -0.162030 | 2.765944  | -1.605252 |
| H  | 1.541333  | 2.297754  | -1.606187 |
| H  | 0.346531  | 1.285205  | -2.435818 |
| C  | -0.910128 | -3.382976 | 0.000000  |
| H  | -0.483281 | -3.880236 | -0.875077 |
| H  | -0.483281 | -3.880236 | 0.875077  |
| H  | -1.988038 | -3.544314 | 0.000000  |

**A13**

E= -628.07588

v= 7.75

|    |           |           |           |
|----|-----------|-----------|-----------|
| B  | -0.097560 | -0.749195 | 0.000000  |
| C  | 0.128409  | 0.505550  | 0.730067  |
| C  | 0.128409  | 0.505550  | -0.730067 |
| Si | 0.428380  | 2.129179  | 0.000000  |
| C  | 2.147390  | 2.838426  | 0.000000  |
| H  | 2.306207  | 3.461144  | 0.883256  |
| H  | 2.888727  | 2.039231  | 0.000000  |
| H  | 2.306207  | 3.461144  | -0.883256 |
| C  | -0.925859 | 3.403549  | 0.000000  |
| H  | -0.852703 | 4.042012  | 0.883269  |
| H  | -0.852703 | 4.042012  | -0.883269 |
| H  | -1.903029 | 2.920381  | 0.000000  |

|   |           |           |           |
|---|-----------|-----------|-----------|
| C | -0.428887 | -2.274835 | 0.000000  |
| C | -1.966209 | -2.392409 | 0.000000  |
| H | -2.402426 | -1.923231 | -0.885871 |
| H | -2.254217 | -3.449225 | 0.000000  |
| H | -2.402426 | -1.923231 | 0.885871  |
| C | 0.128409  | -2.955062 | 1.258092  |
| H | -0.153280 | -4.013607 | 1.273658  |
| H | 1.219661  | -2.897540 | 1.290399  |
| H | -0.258176 | -2.482356 | 2.163951  |
| C | 0.128409  | -2.955062 | -1.258092 |
| H | -0.258176 | -2.482356 | -2.163951 |
| H | 1.219661  | -2.897540 | -1.290399 |
| H | -0.153280 | -4.013607 | -1.273658 |

**A14**

E= -675.34701

v= 48.75

|    |           |           |           |
|----|-----------|-----------|-----------|
| B  | 0.000000  | 0.000000  | -1.156083 |
| C  | 0.732084  | 0.000000  | 0.086354  |
| C  | -0.732084 | 0.000000  | 0.086354  |
| Si | 0.000000  | 0.000000  | 1.745787  |
| C  | 0.000000  | 1.570718  | 2.728209  |
| H  | 0.883423  | 1.617277  | 3.369023  |
| H  | 0.000000  | 2.438572  | 2.068800  |
| H  | -0.883423 | 1.617277  | 3.369023  |
| C  | 0.000000  | -1.570718 | 2.728209  |
| H  | 0.883423  | -1.617277 | 3.369023  |
| H  | -0.883423 | -1.617277 | 3.369023  |
| H  | 0.000000  | -2.438572 | 2.068800  |
| N  | 0.000000  | 0.000000  | -2.660308 |
| O  | 0.000000  | 1.081055  | -3.214181 |
| O  | 0.000000  | -1.081055 | -3.214181 |

**A15**

E= -646.85375

v= 21.04

|    |           |           |           |
|----|-----------|-----------|-----------|
| B  | 0.000000  | 0.000000  | -1.078883 |
| C  | 0.000000  | 0.729568  | 0.199116  |
| C  | 0.000000  | -0.729568 | 0.199116  |
| Si | 0.000000  | 0.000000  | 1.854291  |
| C  | -1.564387 | 0.000000  | 2.858034  |
| H  | -1.605728 | 0.883876  | 3.498470  |
| H  | -2.437087 | 0.000000  | 2.204829  |
| H  | -1.605728 | -0.883876 | 3.498470  |
| C  | 1.564387  | 0.000000  | 2.858034  |
| H  | 1.605728  | 0.883876  | 3.498470  |
| H  | 1.605728  | -0.883876 | 3.498470  |
| H  | 2.437087  | 0.000000  | 2.204829  |
| B  | 0.000000  | 0.000000  | -2.776619 |
| O  | 0.000000  | -1.155679 | -3.495129 |
| H  | 0.000000  | -1.926339 | -2.924922 |
| O  | 0.000000  | 1.155679  | -3.495129 |
| H  | 0.000000  | 1.926339  | -2.924922 |

**B1**

E= -615.83585

v= 37.19

|    |           |           |           |
|----|-----------|-----------|-----------|
| B  | 2.570123  | 1.608064  | 0.000006  |
| C  | 2.969550  | 0.208980  | -0.000029 |
| C  | 1.559690  | 0.521791  | 0.000024  |
| H  | 1.835769  | -2.033080 | 1.251674  |
| H  | 1.835632  | -2.033085 | -1.251637 |
| Si | 2.000756  | -1.292919 | 0.000003  |
| H  | 2.804344  | 2.755076  | 0.000041  |
| C  | -2.679776 | -0.138525 | 0.000071  |
| C  | -3.871965 | -0.366686 | -0.000062 |
| H  | -4.919687 | -0.559281 | 0.000152  |
| Ag | -0.644303 | 0.225054  | -0.000007 |

**B2**

E= -655.16065

v= 24.61

|    |           |           |           |
|----|-----------|-----------|-----------|
| B  | 2.522822  | 0.857235  | 0.002357  |
| C  | 1.351160  | -0.071998 | 0.000645  |
| C  | 2.694502  | -0.593282 | 0.000910  |
| Si | 1.504733  | -1.925608 | -0.000546 |
| C  | 3.023446  | 2.314480  | 0.000089  |
| H  | 2.594194  | 2.860141  | 0.844107  |
| H  | 4.109236  | 2.389704  | 0.046132  |
| H  | 2.675577  | 2.821320  | -0.904177 |
| H  | 1.221755  | -2.635052 | -1.250105 |
| H  | 1.220587  | -2.636965 | 1.247656  |
| C  | -4.134691 | 0.342744  | -0.000193 |
| C  | -2.922969 | 0.267153  | -0.000143 |
| H  | -5.197697 | 0.413333  | -0.000234 |
| Ag | -0.858994 | 0.125644  | 0.000099  |

**B3**

E= -671.24444

v= 24.12

|    |           |           |           |
|----|-----------|-----------|-----------|
| B  | 1.051470  | -1.979527 | 0.000000  |
| C  | -0.175934 | -2.770543 | 0.000000  |
| C  | -0.327449 | -1.344905 | 0.000000  |
| Si | -1.895517 | -2.282795 | 0.000000  |
| N  | 2.415048  | -1.788872 | 0.000000  |
| H  | 3.068955  | -2.554314 | 0.000000  |
| H  | 2.832264  | -0.871608 | 0.000000  |
| H  | -2.673145 | -2.353298 | 1.240699  |
| H  | -2.673145 | -2.353298 | -1.240699 |
| C  | 0.620640  | 4.082007  | 0.000000  |
| C  | 0.382160  | 2.891399  | 0.000000  |
| H  | 0.823112  | 5.127854  | 0.000000  |
| Ag | 0.000000  | 0.856080  | 0.000000  |

**B4**

E= -820.32575

v= 28.70

|    |           |           |           |
|----|-----------|-----------|-----------|
| B  | -2.243569 | -0.186615 | -0.000345 |
| C  | -0.819649 | -0.498680 | -0.000186 |
| C  | -1.806729 | -1.557902 | -0.000403 |
| Si | -0.161837 | -2.266782 | -0.000180 |
| N  | -3.331352 | 0.845065  | -0.000373 |
| O  | -3.727392 | 1.219858  | 1.082914  |
| O  | -3.727075 | 1.220146  | -1.083676 |
| H  | 0.369068  | -2.787178 | 1.259165  |
| H  | 0.369449  | -2.787059 | -1.259413 |
| C  | 3.263770  | 0.793223  | 0.000362  |
| C  | 4.439744  | 1.092283  | 0.000330  |
| H  | 5.469728  | 1.364749  | 0.000417  |
| Ag | 1.271653  | 0.265287  | 0.000259  |

**B5**

E= -814.43986

v= 32.39

|    |           |           |           |
|----|-----------|-----------|-----------|
| B  | -1.861272 | 2.317094  | -0.000389 |
| C  | -2.577912 | 1.044720  | -0.000404 |
| C  | -1.104348 | 1.038146  | -0.000070 |
| Si | -1.923675 | -0.575706 | -0.000079 |
| H  | -1.837985 | 3.486291  | -0.000635 |
| F  | -1.936796 | -1.490864 | 1.277759  |
| F  | -1.936051 | -1.491067 | -1.277769 |
| C  | 4.090810  | -0.797606 | -0.000356 |
| C  | 2.950949  | -0.382060 | -0.000381 |
| H  | 5.091864  | -1.161883 | -0.000234 |
| Ag | 1.014522  | 0.331238  | 0.000240  |

**B6**

E= -853.76580

v= 22.26

|    |           |           |           |
|----|-----------|-----------|-----------|
| B  | 0.947041  | 1.981749  | -0.000108 |
| C  | 0.921159  | 0.466612  | 0.000216  |
| C  | 2.190224  | 1.217852  | -0.000203 |
| Si | 2.405664  | -0.520444 | 0.000082  |
| F  | 2.872883  | -1.324411 | -1.271055 |
| F  | 2.873763  | -1.324766 | 1.270626  |
| C  | 0.101262  | 3.265143  | 0.000042  |
| H  | 0.703670  | 4.172444  | -0.000669 |
| H  | -0.556308 | 3.273382  | 0.874277  |
| H  | -0.557177 | 3.272574  | -0.873613 |
| C  | -3.224449 | -0.705662 | -0.000088 |
| C  | -4.397988 | -1.016034 | -0.000114 |
| H  | -5.427087 | -1.291430 | -0.000167 |
| Ag | -1.230610 | -0.161157 | 0.000092  |

**B7**

E= -971.67555

v= 28.60

|    |           |           |           |
|----|-----------|-----------|-----------|
| B  | -0.863169 | -1.408879 | -0.000081 |
| C  | -2.174710 | -0.765418 | -0.000127 |
| C  | -0.982500 | 0.103579  | -0.000089 |
| Si | -2.552112 | 0.945761  | 0.000007  |
| F  | -3.098050 | 1.701168  | 1.270744  |
| F  | -3.098294 | 1.701247  | -1.270576 |
| C  | 0.101831  | -2.621759 | 0.000027  |
| C  | -0.690696 | -3.937495 | 0.000084  |
| H  | -0.002158 | -4.787565 | 0.000070  |
| H  | -1.328007 | -4.017676 | 0.884059  |
| H  | -1.328119 | -4.017726 | -0.883805 |
| C  | 0.995058  | -2.546669 | -1.254975 |
| H  | 1.612175  | -1.643320 | -1.261527 |
| H  | 1.668492  | -3.408947 | -1.264460 |
| H  | 0.406642  | -2.571547 | -2.175978 |
| C  | 0.995114  | -2.546607 | 1.254950  |
| H  | 1.612202  | -1.643237 | 1.261487  |
| H  | 0.406759  | -2.571500 | 2.175994  |
| H  | 1.668587  | -3.408855 | 1.264417  |
| C  | 4.227802  | 1.946133  | 0.000021  |
| C  | 3.074418  | 1.567302  | -0.000010 |
| H  | 5.237405  | 2.286139  | 0.000024  |
| Ag | 1.118737  | 0.888763  | -0.000016 |

**B8**

E= -869.85278

v= 23.35

|    |           |           |           |
|----|-----------|-----------|-----------|
| B  | -1.416163 | -1.534851 | 0.000000  |
| C  | -2.414395 | -0.461313 | 0.000000  |
| C  | -1.002206 | -0.068929 | 0.000000  |
| Si | -2.165656 | 1.266919  | 0.000000  |
| F  | -2.414395 | 2.176979  | 1.264625  |
| F  | -2.414395 | 2.176979  | -1.264625 |
| N  | -1.020503 | -2.848788 | 0.000000  |
| H  | -0.050613 | -3.125893 | 0.000000  |
| H  | -1.680240 | -3.610078 | 0.000000  |
| C  | 3.282954  | -0.529214 | 0.000000  |
| C  | 4.481994  | -0.717718 | 0.000000  |
| H  | 5.535465  | -0.876037 | 0.000000  |
| Ag | 1.236339  | -0.234716 | 0.000000  |

**B9**

E= -1151.47519

v= 19.17

|    |           |          |           |
|----|-----------|----------|-----------|
| B  | -1.988305 | 0.241970 | -0.041831 |
| C  | -0.529135 | 0.429597 | -0.025025 |
| C  | -1.446608 | 1.586771 | -0.020897 |
| Si | 0.233412  | 2.081919 | -0.000378 |
| F  | 0.937894  | 2.677706 | -1.269945 |
| F  | 0.913039  | 2.649577 | 1.295278  |

|    |           |           |           |
|----|-----------|-----------|-----------|
| C  | -3.202099 | -0.775337 | -0.007925 |
| F  | -3.359265 | -1.226800 | 1.246630  |
| F  | -4.356876 | -0.217402 | -0.384423 |
| F  | -2.988665 | -1.832584 | -0.799371 |
| C  | 3.270861  | -1.560599 | 0.009801  |
| C  | 4.370738  | -2.071803 | 0.025819  |
| H  | 5.334822  | -2.524516 | 0.039536  |
| Ag | 1.409389  | -0.679541 | -0.010835 |

**B10**

E= -1018.92646

v= 21.31

|    |           |           |           |
|----|-----------|-----------|-----------|
| B  | -2.288739 | 0.080672  | 0.000153  |
| C  | -0.855239 | -0.203063 | 0.000033  |
| C  | -1.847474 | -1.294330 | 0.000128  |
| Si | -0.207429 | -1.912279 | 0.000063  |
| F  | 0.429649  | -2.544741 | 1.285364  |
| F  | 0.429845  | -2.544523 | -1.285262 |
| N  | -3.387740 | 1.097320  | 0.000106  |
| O  | -3.784918 | 1.465214  | 1.084325  |
| O  | -3.785012 | 1.464809  | -1.084220 |
| C  | 3.167642  | 1.275232  | 0.000211  |
| C  | 4.322155  | 1.646684  | 0.000558  |
| H  | 5.334233  | 1.979500  | 0.000848  |
| Ag | 1.209130  | 0.649444  | -0.000225 |

**B11**

E= -694.48671

v= 31.99

|    |           |           |           |
|----|-----------|-----------|-----------|
| B  | 1.981118  | 2.331845  | -0.000004 |
| C  | 2.584634  | 1.007815  | 0.000012  |
| C  | 1.139642  | 1.114461  | -0.000033 |
| Si | 1.853917  | -0.629094 | 0.000007  |
| C  | 1.765748  | -1.585816 | 1.581137  |
| H  | 2.617682  | -2.264989 | 1.663070  |
| H  | 1.769871  | -0.913737 | 2.439477  |
| H  | 0.850240  | -2.181443 | 1.606218  |
| C  | 1.765835  | -1.585832 | -1.581118 |
| H  | 2.617816  | -2.264950 | -1.663033 |
| H  | 0.850371  | -2.181527 | -1.606201 |
| H  | 1.769918  | -0.913764 | -2.439466 |
| H  | 2.048781  | 3.501422  | -0.000006 |
| C  | -3.991164 | -0.879778 | -0.000027 |
| C  | -2.880236 | -0.389457 | -0.000014 |
| H  | -4.970106 | -1.299672 | -0.000043 |
| Ag | -0.972803 | 0.416562  | 0.000003  |

**B12**

E= -733.81025

v= 30.48

|    |           |           |           |
|----|-----------|-----------|-----------|
| B  | -2.303294 | -1.497166 | 0.004765  |
| C  | -2.552893 | -0.057415 | 0.002052  |
| C  | -1.181757 | -0.517050 | 0.001303  |
| Si | -1.436407 | 1.343201  | -0.000174 |
| C  | -1.107743 | 2.256530  | 1.576943  |
| H  | -1.740336 | 3.145076  | 1.641628  |
| H  | -1.308541 | 1.620273  | 2.439177  |
| H  | -0.064142 | 2.577980  | 1.613626  |
| C  | -1.109724 | 2.253842  | -1.579250 |
| H  | -1.742381 | 3.142295  | -1.644580 |
| H  | -0.066157 | 2.575209  | -1.617570 |
| H  | -1.311478 | 1.616271  | -2.440283 |
| C  | -2.744366 | -2.977015 | 0.000589  |
| H  | -2.424028 | -3.450699 | -0.931750 |
| H  | -2.251336 | -3.522919 | 0.808581  |
| H  | -3.822696 | -3.100147 | 0.096888  |
| C  | 3.098304  | -0.215012 | -0.000512 |
| C  | 4.304505  | -0.073974 | -0.000739 |
| H  | 5.363517  | 0.041620  | -0.000735 |

|    |          |           |          |
|----|----------|-----------|----------|
| Ag | 1.037357 | -0.425178 | 0.000241 |
|----|----------|-----------|----------|

**B13**

E= -851.71780

v= 11.49

|    |           |           |           |
|----|-----------|-----------|-----------|
| B  | -1.957173 | 0.306130  | -0.028742 |
| C  | -0.487800 | 0.564796  | -0.019639 |
| C  | -1.426158 | 1.666233  | -0.014841 |
| Si | 0.260761  | 2.276446  | -0.000815 |
| C  | 1.031317  | 2.891057  | -1.568040 |
| H  | 2.088564  | 2.616468  | -1.596499 |
| H  | 0.535207  | 2.456764  | -2.436186 |
| H  | 0.961047  | 3.979410  | -1.631279 |
| C  | 1.012198  | 2.860412  | 1.587335  |
| H  | 2.070036  | 2.588991  | 1.622136  |
| H  | 0.936879  | 3.946897  | 1.673292  |
| H  | 0.507684  | 2.405523  | 2.440046  |
| C  | -3.069275 | -0.779495 | -0.008927 |
| C  | -2.991454 | -1.484229 | 1.360261  |
| H  | -3.185803 | -0.790880 | 2.182984  |
| H  | -3.744863 | -2.277299 | 1.405280  |
| H  | -2.010252 | -1.939621 | 1.518552  |
| C  | -2.788754 | -1.810928 | -1.115762 |
| H  | -3.534652 | -2.611024 | -1.070774 |
| H  | -2.842501 | -1.359012 | -2.109773 |
| H  | -1.799571 | -2.261128 | -0.998228 |
| C  | -4.463572 | -0.167977 | -0.198706 |
| H  | -4.681642 | 0.569158  | 0.577910  |
| H  | -4.551201 | 0.329490  | -1.167823 |
| H  | -5.228020 | -0.950317 | -0.150021 |
| C  | 3.053113  | -1.842794 | 0.008545  |
| C  | 4.073293  | -2.501642 | 0.019146  |
| H  | 4.965329  | -3.084071 | 0.028234  |
| Ag | 1.318969  | -0.710486 | -0.009127 |

**B14**

E= -898.97994

v= 24.40

|    |           |           |           |
|----|-----------|-----------|-----------|
| B  | -2.331697 | -0.004974 | -0.000031 |
| C  | -0.887419 | -0.186163 | -0.000028 |
| C  | -1.778830 | -1.332411 | -0.000074 |
| Si | -0.076963 | -1.911778 | -0.000023 |
| C  | 0.662562  | -2.488028 | 1.589909  |
| H  | 1.728420  | -2.248794 | 1.611551  |
| H  | 0.176118  | -2.007308 | 2.439109  |
| H  | 0.550317  | -3.570776 | 1.687416  |
| C  | 0.662723  | -2.487959 | -1.589903 |
| H  | 1.728540  | -2.248544 | -1.611525 |
| H  | 0.550667  | -3.570732 | -1.687358 |
| H  | 0.176218  | -2.007370 | -2.439143 |
| N  | -3.508705 | 0.924588  | -0.000014 |
| O  | -3.938945 | 1.264486  | 1.082563  |
| O  | -3.938952 | 1.264550  | -1.082563 |
| C  | 3.122968  | 1.327732  | 0.000049  |
| C  | 4.296667  | 1.638006  | -0.000061 |
| H  | 5.322384  | 1.926265  | 0.000017  |
| Ag | 1.140753  | 0.744373  | 0.000024  |

**B15**

E= -870.49483

v= 24.58

|    |           |          |          |
|----|-----------|----------|----------|
| B  | -1.412513 | 0.486258 | 0.000000 |
| C  | -1.135904 | 1.919181 | 0.000000 |
| C  | 0.005693  | 1.031387 | 0.000000 |
| Si | 0.429421  | 2.820200 | 0.000000 |
| C  | 1.038269  | 3.576779 | 1.576866 |
| H  | 0.769957  | 4.634792 | 1.620291 |
| H  | 0.604304  | 3.070798 | 2.439373 |
| H  | 2.126316  | 3.503540 | 1.639052 |

|    |           |           |           |
|----|-----------|-----------|-----------|
| C  | 1.038269  | 3.576779  | -1.576866 |
| H  | 0.769957  | 4.634792  | -1.620291 |
| H  | 2.126316  | 3.503540  | -1.639052 |
| H  | 0.604304  | 3.070798  | -2.439373 |
| B  | -2.536259 | -0.810188 | 0.000000  |
| O  | -2.248104 | -2.125191 | 0.000000  |
| H  | -1.325033 | -2.411812 | 0.000000  |
| O  | -3.859446 | -0.480271 | 0.000000  |
| H  | -4.008541 | 0.466154  | 0.000000  |
| C  | 1.086183  | -3.094804 | 0.000000  |
| C  | 1.038269  | -4.308567 | 0.000000  |
| H  | 1.020824  | -5.373934 | 0.000000  |
| Ag | 0.882538  | -1.028142 | 0.000000  |

**butadiene**

E= -155.94919

$\nu= 160.35$

|   |           |           |          |
|---|-----------|-----------|----------|
| C | 0.607451  | 1.737207  | 0.000000 |
| C | 0.607451  | 0.405362  | 0.000000 |
| H | 1.527568  | 2.307609  | 0.000000 |
| H | -0.322323 | 2.296905  | 0.000000 |
| H | 1.550318  | -0.136359 | 0.000000 |
| C | -0.607451 | -0.405362 | 0.000000 |
| C | -0.607451 | -1.737207 | 0.000000 |
| H | -1.550318 | 0.136359  | 0.000000 |
| H | -1.527568 | -2.307609 | 0.000000 |
| H | 0.322323  | -2.296905 | 0.000000 |

**PA5**

E= -746.85256

$\nu= 70.45$

|    |           |           |           |
|----|-----------|-----------|-----------|
| C  | 1.221823  | 1.612420  | -0.239592 |
| C  | 2.241812  | 0.723733  | 0.443923  |
| H  | 1.721574  | 2.151777  | -1.051209 |
| H  | 0.889232  | 2.369012  | 0.477454  |
| H  | 3.081862  | 1.265851  | 0.869135  |
| C  | 2.244489  | -0.602067 | 0.594382  |
| C  | 1.227838  | -1.625001 | 0.127820  |
| H  | 3.086898  | -1.032859 | 1.128384  |
| H  | 1.728683  | -2.327578 | -0.546803 |
| H  | 0.902765  | -2.206700 | 0.995569  |
| B  | 0.239915  | -0.216622 | -1.862195 |
| C  | 0.058681  | -0.969523 | -0.568541 |
| C  | 0.058037  | 0.812309  | -0.776066 |
| Si | -1.273811 | 0.011650  | 0.109730  |
| H  | 0.745902  | -0.340881 | -2.919591 |
| F  | -2.772751 | -0.058038 | -0.428184 |
| F  | -1.431605 | 0.205834  | 1.687102  |

**PA6**

E= -786.17562

$\nu= 63.91$

|    |           |           |           |
|----|-----------|-----------|-----------|
| C  | -1.006797 | -0.588641 | -1.625234 |
| C  | -1.815272 | -1.440444 | -0.667119 |
| H  | -1.702555 | -0.024249 | -2.256281 |
| H  | -0.455537 | -1.254879 | -2.295773 |
| H  | -2.478942 | -2.147257 | -1.157536 |
| C  | -1.815278 | -1.440416 | 0.667121  |
| C  | -1.006854 | -0.588556 | 1.625209  |
| H  | -2.478812 | -2.147347 | 1.157555  |
| H  | -1.702598 | -0.024188 | 2.256300  |
| H  | -0.455568 | -1.254799 | 2.295719  |
| B  | -0.622921 | 1.444483  | -0.000052 |
| C  | -0.077623 | 0.352130  | -0.894357 |
| C  | -0.077632 | 0.352172  | 0.894336  |
| Si | 1.427761  | -0.001429 | 0.000011  |
| F  | 2.702385  | 0.957798  | -0.000042 |
| F  | 2.048228  | -1.474222 | 0.000072  |
| C  | -1.650028 | 2.607310  | -0.000003 |

|   |           |          |           |
|---|-----------|----------|-----------|
| H | -2.280873 | 2.611784 | -0.891102 |
| H | -1.096594 | 3.553668 | 0.000360  |
| H | -2.281190 | 2.611340 | 0.890878  |

**PA7**

E= -904.08481

$\nu= 29.53$

|    |           |           |           |
|----|-----------|-----------|-----------|
| C  | 0.489447  | -1.299998 | -1.622776 |
| C  | 0.331290  | -2.465628 | -0.667619 |
| H  | -0.327880 | -1.333284 | -2.350514 |
| H  | 1.413706  | -1.447037 | -2.190923 |
| H  | 0.225861  | -3.429646 | -1.158033 |
| C  | 0.331276  | -2.465625 | 0.667569  |
| C  | 0.489515  | -1.300020 | 1.622730  |
| H  | 0.225621  | -3.429618 | 1.157981  |
| H  | -0.327826 | -1.333310 | 2.350451  |
| H  | 1.413772  | -1.447070 | 2.190884  |
| B  | -0.666920 | 0.411177  | -0.000005 |
| C  | 0.492473  | 0.025742  | 0.894561  |
| C  | 0.492481  | 0.025745  | -0.894583 |
| Si | 1.807331  | 0.838461  | -0.000015 |
| F  | 3.282971  | 0.223325  | 0.000088  |
| F  | 2.041727  | 2.416513  | -0.000067 |
| C  | -2.222553 | 0.531314  | 0.000008  |
| C  | -2.827039 | -0.110168 | -1.256319 |
| H  | -3.912576 | 0.035797  | -1.275301 |
| H  | -2.409006 | 0.331036  | -2.165270 |
| H  | -2.634048 | -1.187003 | -1.279528 |
| C  | -2.826986 | -0.110497 | 1.256193  |
| H  | -2.408995 | 0.330548  | 2.165242  |
| H  | -3.912535 | 0.035371  | 1.275205  |
| H  | -2.633893 | -1.187320 | 1.279175  |
| C  | -2.536634 | 2.042933  | 0.000214  |
| H  | -2.130003 | 2.538371  | 0.885929  |
| H  | -2.130042 | 2.538612  | -0.885384 |
| H  | -3.622087 | 2.188889  | 0.000255  |

**PA8**

E= -802.26351

$\nu= 55.14$

|    |           |           |           |
|----|-----------|-----------|-----------|
| C  | 1.059385  | -0.527624 | 1.613091  |
| C  | 1.977710  | -1.270105 | 0.666124  |
| H  | 1.676622  | 0.063372  | 2.298259  |
| H  | 0.542319  | -1.266338 | 2.234130  |
| H  | 2.722262  | -1.887603 | 1.161107  |
| C  | 1.977957  | -1.269531 | -0.666561 |
| C  | 1.059982  | -0.526214 | -1.613226 |
| H  | 2.722832  | -1.886428 | -1.161806 |
| H  | 1.677538  | 0.065692  | -2.297320 |
| H  | 0.543443  | -1.264294 | -2.235457 |
| B  | 0.510081  | 1.515911  | 0.000551  |
| C  | 0.072948  | 0.360438  | 0.888464  |
| C  | 0.073035  | 0.360927  | -0.888178 |
| Si | -1.406526 | -0.094611 | -0.000125 |
| F  | -2.769588 | 0.736983  | -0.000148 |
| F  | -1.881925 | -1.622036 | -0.000263 |
| N  | 1.246103  | 2.688433  | 0.000612  |
| H  | 1.535206  | 3.149931  | -0.845814 |
| H  | 1.535526  | 3.149769  | 0.847016  |

**PA9**

E= -1083.89937

$\nu= 22.21$

|   |           |           |           |
|---|-----------|-----------|-----------|
| C | 0.322005  | -1.222084 | -1.641339 |
| C | 0.223543  | -2.381295 | -0.667353 |
| H | -0.581433 | -1.211994 | -2.258750 |
| H | 1.165247  | -1.404329 | -2.313151 |
| H | 0.142059  | -3.349115 | -1.153522 |
| C | 0.223523  | -2.381256 | 0.667303  |

|    |           |           |           |
|----|-----------|-----------|-----------|
| C  | 0.321940  | -1.222016 | 1.641237  |
| H  | 0.142219  | -3.349072 | 1.153514  |
| H  | -0.581418 | -1.211977 | 2.258763  |
| H  | 1.165275  | -1.404205 | 2.312949  |
| B  | -0.611936 | 0.571072  | -0.000139 |
| C  | 0.468763  | 0.092398  | -0.912820 |
| C  | 0.468674  | 0.092446  | 0.912683  |
| Si | 1.863762  | 0.759960  | -0.000004 |
| F  | 2.229616  | 2.307589  | -0.000192 |
| F  | 3.267632  | 0.005348  | 0.000242  |
| C  | -2.196533 | 0.592524  | -0.000014 |
| F  | -2.676615 | 1.849662  | 0.001339  |
| F  | -2.714762 | -0.024008 | -1.079548 |
| F  | -2.714364 | -0.026193 | 1.078465  |

**P<sub>A10</sub>**

E= -951.35831

$\nu = 62.27$

|    |           |           |           |
|----|-----------|-----------|-----------|
| C  | -0.094681 | -1.156628 | -1.636141 |
| C  | -0.146412 | -2.321818 | -0.666290 |
| H  | -1.053213 | -1.108249 | -2.162627 |
| H  | 0.674255  | -1.355562 | -2.386575 |
| H  | -0.209116 | -3.288981 | -1.155540 |
| C  | -0.146249 | -2.321801 | 0.666505  |
| C  | -0.094330 | -1.156597 | 1.636311  |
| H  | -0.208749 | -3.288964 | 1.155780  |
| H  | -1.052715 | -1.108238 | 2.163072  |
| H  | 0.674815  | -1.355480 | 2.386541  |
| B  | -0.835351 | 0.740282  | 0.000120  |
| C  | 0.173137  | 0.141520  | -0.914175 |
| C  | 0.173272  | 0.141561  | 0.914265  |
| Si | 1.629603  | 0.671208  | -0.000088 |
| F  | 2.152155  | 2.171075  | -0.000200 |
| F  | 2.940640  | -0.230528 | -0.000087 |
| N  | -2.331613 | 0.885798  | 0.000083  |
| O  | -2.805399 | 2.002871  | 0.000461  |
| O  | -2.965257 | -0.154843 | -0.000568 |

**P<sub>A11</sub>**

E= -626.87690

$\nu = 87.01$

|    |           |           |           |
|----|-----------|-----------|-----------|
| C  | -1.244634 | -0.131754 | 1.603192  |
| C  | -2.266329 | 0.476458  | 0.667236  |
| H  | -1.748426 | -0.882086 | 2.223140  |
| H  | -0.903944 | 0.648856  | 2.292627  |
| H  | -3.097282 | 0.971071  | 1.164033  |
| C  | -2.266338 | 0.476326  | -0.667306 |
| C  | -1.244634 | -0.132005 | -1.603178 |
| H  | -3.097362 | 0.970739  | -1.164189 |
| H  | -1.748424 | -0.882470 | -2.222959 |
| H  | -0.903973 | 0.648482  | -2.292766 |
| B  | -0.225225 | -1.979092 | 0.000144  |
| C  | -0.085229 | -0.753060 | 0.852435  |
| C  | -0.085222 | -0.753196 | -0.852337 |
| Si | 1.268153  | 0.141831  | -0.000008 |
| C  | 3.022852  | -0.494865 | 0.000019  |
| H  | 3.562910  | -0.145832 | 0.883323  |
| H  | 3.031054  | -1.585525 | 0.000048  |
| H  | 3.562915  | -0.145879 | -0.883300 |
| C  | 1.163397  | 2.010867  | -0.000125 |
| H  | 1.650250  | 2.435175  | 0.881107  |
| H  | 1.650335  | 2.435114  | -0.881336 |
| H  | 0.116494  | 2.324273  | -0.000176 |
| H  | -0.665743 | -3.074719 | 0.000238  |

**P<sub>A12</sub>**

E= -666.19879

$\nu = 29.05$

|   |          |           |          |
|---|----------|-----------|----------|
| C | 1.036838 | -0.569464 | 1.599815 |
|---|----------|-----------|----------|

|    |           |           |           |
|----|-----------|-----------|-----------|
| C  | 1.806323  | -1.479506 | 0.667186  |
| H  | 1.758067  | -0.025201 | 2.221398  |
| H  | 0.461026  | -1.195052 | 2.291225  |
| H  | 2.429778  | -2.217735 | 1.165337  |
| C  | 1.806359  | -1.479456 | -0.667226 |
| C  | 1.036930  | -0.569329 | -1.599821 |
| H  | 2.429845  | -2.217642 | -1.165401 |
| H  | 1.758206  | -0.024986 | -2.221280 |
| H  | 0.461184  | -1.194845 | -2.291349 |
| B  | 0.692432  | 1.510783  | 0.000065  |
| C  | 0.143662  | 0.398061  | -0.851421 |
| C  | 0.143636  | 0.398013  | 0.851451  |
| Si | -1.428093 | -0.001602 | -0.000030 |
| C  | -1.938020 | -1.803369 | -0.000018 |
| H  | -2.535551 | -2.047981 | -0.881452 |
| H  | -1.047731 | -2.437050 | -0.000059 |
| H  | -2.535462 | -2.047972 | 0.881480  |
| C  | -2.882166 | 1.171054  | -0.000014 |
| H  | -3.506209 | 1.015443  | -0.883262 |
| H  | -3.505943 | 1.015737  | 0.883473  |
| H  | -2.536682 | 2.205827  | -0.000237 |
| C  | 1.698001  | 2.697224  | 0.000065  |
| H  | 2.330071  | 2.712791  | 0.890692  |
| H  | 2.330338  | 2.712503  | -0.890382 |
| H  | 1.130829  | 3.635296  | -0.000193 |

**P<sub>A13</sub>**

E= -784.10801

$\nu = 22.03$

|    |           |           |           |
|----|-----------|-----------|-----------|
| C  | -0.561783 | -1.282706 | 1.601494  |
| C  | -0.649693 | -2.469592 | 0.667463  |
| H  | 0.288878  | -1.434846 | 2.275845  |
| H  | -1.452779 | -1.285376 | 2.240080  |
| H  | -0.733388 | -3.432923 | 1.164625  |
| C  | -0.649815 | -2.469576 | -0.667432 |
| C  | -0.561900 | -1.282678 | -1.601464 |
| H  | -0.733754 | -3.432881 | -1.164602 |
| H  | 0.288688  | -1.434882 | -2.275894 |
| H  | -1.452968 | -1.285256 | -2.239939 |
| B  | 0.778057  | 0.342456  | 0.000023  |
| C  | -0.420129 | 0.027302  | 0.853820  |
| C  | -0.420114 | 0.027318  | -0.853777 |
| Si | -1.749310 | 0.954176  | 0.000046  |
| C  | -1.802023 | 2.820736  | 0.000043  |
| H  | -2.322116 | 3.197750  | 0.883722  |
| H  | -0.787302 | 3.222323  | 0.000187  |
| H  | -2.321864 | 3.197741  | -0.883787 |
| C  | -3.442732 | 0.156724  | -0.000035 |
| H  | -4.020389 | 0.445272  | 0.881285  |
| H  | -4.020258 | 0.445114  | -0.881490 |
| H  | -3.334989 | -0.930981 | 0.000075  |
| C  | 2.340744  | 0.393814  | 0.000000  |
| C  | 2.726908  | 1.887089  | -0.000728 |
| H  | 2.342621  | 2.400404  | 0.885449  |
| H  | 3.818090  | 1.986659  | -0.000977 |
| H  | 2.342269  | 2.399611  | -0.887205 |
| C  | 2.913919  | -0.275682 | -1.256124 |
| H  | 4.005367  | -0.178378 | -1.281728 |
| H  | 2.672887  | -1.342914 | -1.277287 |
| H  | 2.508947  | 0.180005  | -2.163826 |
| C  | 2.914033  | -0.274483 | 1.256694  |
| H  | 2.509048  | 0.181984  | 2.163997  |
| H  | 2.673098  | -1.341714 | 1.278824  |
| H  | 4.005472  | -0.177058 | 1.282168  |

**TS<sub>A5-endo</sub>**

E= -746.74748

$\nu = 380.13i$

|   |          |          |           |
|---|----------|----------|-----------|
| C | 1.806569 | 0.167172 | -1.480036 |
|---|----------|----------|-----------|



|    |           |           |           |
|----|-----------|-----------|-----------|
| C  | 1.793685  | -0.961404 | -0.709686 |
| H  | 1.694784  | 0.100653  | -2.554604 |
| H  | 2.214043  | 1.099262  | -1.111255 |
| H  | 1.568782  | -1.906117 | -1.194286 |
| C  | 1.793774  | -0.961251 | 0.709795  |
| C  | 1.806774  | 0.167492  | 1.479901  |
| H  | 1.568943  | -1.905861 | 1.194633  |
| H  | 1.695135  | 0.101230  | 2.554502  |
| H  | 2.214163  | 1.099499  | 1.110806  |
| B  | 0.173771  | 2.232296  | -0.000117 |
| C  | -0.225856 | 1.059137  | -0.795133 |
| C  | -0.225834 | 1.059233  | 0.795042  |
| Si | -1.293390 | -0.098896 | 0.000032  |
| H  | 0.707610  | 3.280840  | -0.000200 |
| F  | -2.875887 | 0.013988  | 0.000040  |
| F  | -1.004060 | -1.661623 | 0.000099  |

**TS<sub>A6-endo</sub>**  
E= -786.07106  
v= 380.56i

|    |           |           |           |
|----|-----------|-----------|-----------|
| C  | -1.267642 | 1.171051  | -1.478607 |
| C  | -0.586692 | 2.072107  | -0.709408 |
| H  | -1.137881 | 1.157338  | -2.553087 |
| H  | -2.151746 | 0.666315  | -1.110364 |
| H  | 0.155848  | 2.697529  | -1.194487 |
| C  | -0.586765 | 2.072045  | 0.709548  |
| C  | -1.267773 | 1.170849  | 1.478565  |
| H  | 0.155722  | 2.697414  | 1.194775  |
| H  | -1.138216 | 1.157067  | 2.553070  |
| H  | -2.151865 | 0.666217  | 1.110140  |
| B  | -1.215092 | -1.448952 | -0.000054 |
| C  | -0.174588 | -0.759998 | -0.792781 |
| C  | -0.174619 | -0.759990 | 0.792729  |
| Si | 1.374414  | -0.478547 | 0.000009  |
| F  | 2.080996  | 0.946249  | -0.000009 |
| F  | 2.578164  | -1.514607 | 0.000037  |
| C  | -2.606844 | -2.130958 | -0.000046 |
| H  | -3.188345 | -1.888185 | 0.891370  |
| H  | -2.464313 | -3.216673 | -0.000155 |
| H  | -3.188441 | -1.888027 | -0.891359 |

**TS<sub>A7-endo</sub>**  
E= -903.97890  
v= 380.35i

|    |           |           |           |
|----|-----------|-----------|-----------|
| C  | -0.610596 | -1.743511 | -1.502603 |
| C  | -1.650027 | -2.073328 | -0.678812 |
| H  | -0.767377 | -1.638181 | -2.568625 |
| H  | 0.417792  | -1.870882 | -1.194418 |
| H  | -2.645357 | -2.128188 | -1.107764 |
| C  | -1.569259 | -2.090570 | 0.737561  |
| C  | -0.442735 | -1.775639 | 1.445036  |
| H  | -2.508210 | -2.159095 | 1.277683  |
| H  | -0.469366 | -1.704455 | 2.524741  |
| H  | 0.542953  | -1.887817 | 1.009613  |
| B  | 0.988235  | 0.411117  | -0.000536 |
| C  | -0.257715 | 0.434404  | 0.795485  |
| C  | -0.263332 | 0.446410  | -0.790901 |
| Si | -1.679918 | 1.121603  | 0.011559  |
| F  | -2.044199 | 2.667253  | 0.027188  |
| F  | -3.090552 | 0.386157  | 0.012804  |
| C  | 2.540620  | 0.239524  | 0.001105  |
| C  | 3.073338  | 0.039307  | 1.425640  |
| H  | 4.165177  | -0.047124 | 1.417682  |
| H  | 2.801348  | 0.879760  | 2.068529  |
| H  | 2.667870  | -0.869577 | 1.879275  |
| C  | 2.958845  | -0.946607 | -0.883540 |
| H  | 2.564557  | -0.845758 | -1.898251 |
| H  | 4.051123  | -0.995899 | -0.945839 |
| H  | 2.614618  | -1.901599 | -0.473309 |

|   |          |          |           |
|---|----------|----------|-----------|
| C | 3.134095 | 1.531481 | -0.595165 |
| H | 2.784087 | 1.692518 | -1.617681 |
| H | 2.864952 | 2.408872 | -0.000917 |
| H | 4.226876 | 1.459887 | -0.612632 |

**TS<sub>A8-endo</sub>**  
E= -802.15621  
v= 384.60i

|    |           |           |           |
|----|-----------|-----------|-----------|
| C  | -1.399530 | 1.029442  | -1.471229 |
| C  | -0.836242 | 2.013375  | -0.709668 |
| H  | -1.273816 | 1.028704  | -2.546421 |
| H  | -2.204890 | 0.412436  | -1.093041 |
| H  | -0.185102 | 2.731271  | -1.198072 |
| C  | -0.836248 | 2.013349  | 0.709723  |
| C  | -1.399525 | 1.029373  | 1.471243  |
| H  | -0.185132 | 2.731235  | 1.198174  |
| H  | -1.273829 | 1.028604  | 2.546438  |
| H  | -2.204880 | 0.412379  | 1.093026  |
| B  | -1.061773 | -1.602284 | -0.000021 |
| C  | -0.106078 | -0.782335 | -0.784717 |
| C  | -0.106085 | -0.782339 | 0.784698  |
| Si | 1.406670  | -0.354890 | -0.000003 |
| F  | 1.948015  | 1.141390  | -0.000035 |
| F  | 2.729125  | -1.237172 | 0.000025  |
| N  | -2.244659 | -2.327734 | -0.000020 |
| H  | -2.668136 | -2.666879 | 0.847525  |
| H  | -2.668136 | -2.666891 | -0.847561 |

**TS<sub>A9-endo</sub>**  
E= -1083.79281  
v= 359.68i

|    |           |           |           |
|----|-----------|-----------|-----------|
| C  | 0.287724  | 1.730554  | -1.489769 |
| C  | 1.321339  | 2.153195  | -0.705153 |
| H  | 0.408945  | 1.654904  | -2.562924 |
| H  | -0.736106 | 1.723878  | -1.138673 |
| H  | 2.284468  | 2.319437  | -1.177359 |
| C  | 1.305175  | 2.154750  | 0.716416  |
| C  | 0.254675  | 1.733220  | 1.478747  |
| H  | 2.257189  | 2.322152  | 1.210259  |
| H  | 0.349658  | 1.660831  | 2.554702  |
| H  | -0.760819 | 1.725056  | 1.103274  |
| B  | -0.915610 | -0.590731 | -0.001203 |
| C  | 0.299843  | -0.516794 | -0.803293 |
| C  | 0.297774  | -0.515181 | 0.802761  |
| Si | 1.787333  | -1.033911 | 0.001992  |
| F  | 3.098040  | -0.142439 | 0.003567  |
| F  | 2.303031  | -2.530447 | 0.004903  |
| C  | -2.485775 | -0.376266 | -0.000304 |
| F  | -3.152275 | -1.532105 | -0.138723 |
| F  | -2.919361 | 0.200120  | 1.135772  |
| F  | -2.877488 | 0.431681  | -1.006363 |

**TS<sub>A10-endo</sub>**  
E= -951.25234  
v= 335.82i

|    |           |           |           |
|----|-----------|-----------|-----------|
| C  | 0.140867  | -1.729661 | -1.479549 |
| C  | -0.885817 | -2.193479 | -0.712231 |
| H  | 0.034747  | -1.666052 | -2.555260 |
| H  | 1.152121  | -1.653378 | -1.097384 |
| H  | -1.829953 | -2.417744 | -1.198601 |
| C  | -0.885799 | -2.193560 | 0.712171  |
| C  | 0.140905  | -1.729840 | 1.479510  |
| H  | -1.829920 | -2.417888 | 1.198540  |
| H  | 0.034813  | -1.666320 | 2.555229  |
| H  | 1.152137  | -1.653454 | 1.097312  |
| B  | 1.175027  | 0.706105  | 0.000017  |
| C  | -0.022257 | 0.543884  | 0.801578  |
| C  | -0.022265 | 0.543854  | -0.801547 |
| Si | -1.535788 | 0.987569  | 0.000019  |

|   |           |           |           |
|---|-----------|-----------|-----------|
| F | -2.122232 | 2.456229  | 0.000010  |
| F | -2.794992 | 0.028683  | 0.000018  |
| N | 2.675337  | 0.583184  | 0.000003  |
| O | 3.349036  | 1.587674  | 0.000031  |
| O | 3.106690  | -0.559591 | -0.000037 |

**TS<sub>A11-endo</sub>**

E= -626.77323

v= 390.23i

|    |           |           |           |
|----|-----------|-----------|-----------|
| C  | 1.860156  | 0.237801  | -1.481545 |
| C  | 1.944592  | -0.889284 | -0.708232 |
| H  | 1.751100  | 0.156894  | -2.555571 |
| H  | 2.227954  | 1.190143  | -1.125993 |
| H  | 1.812300  | -1.850645 | -1.195685 |
| C  | 1.944586  | -0.889404 | 0.708088  |
| C  | 1.860140  | 0.237548  | 1.481592  |
| H  | 1.812290  | -1.850849 | 1.195375  |
| H  | 1.751071  | 0.156457  | 2.555603  |
| H  | 2.227922  | 1.189957  | 1.126204  |
| B  | 0.230690  | 2.223721  | 0.000114  |
| C  | -0.173720 | 1.042819  | 0.771496  |
| C  | -0.173703 | 1.042890  | -0.771389 |
| Si | -1.322026 | -0.131750 | -0.000011 |
| C  | -3.141073 | 0.275437  | -0.000031 |
| H  | -3.627629 | -0.146356 | 0.882928  |
| H  | -3.292756 | 1.354604  | -0.000129 |
| H  | -3.627650 | -0.146524 | -0.882898 |
| C  | -1.036942 | -1.977597 | -0.000032 |
| H  | -0.482664 | -2.294978 | 0.883092  |
| H  | -2.005313 | -2.482298 | -0.000099 |
| H  | -0.482551 | -2.294942 | -0.883091 |
| H  | 0.786629  | 3.263160  | 0.000163  |

**TS<sub>A12-endo</sub>**

E= -666.09569

v= 385.61i

|    |           |           |           |
|----|-----------|-----------|-----------|
| C  | -1.500296 | -0.930267 | 1.481152  |
| C  | -1.047129 | -1.965124 | 0.707856  |
| H  | -1.364498 | -0.950268 | 2.554905  |
| H  | -2.273839 | -0.262178 | 1.127195  |
| H  | -0.479711 | -2.752614 | 1.194634  |
| C  | -1.050892 | -1.964455 | -0.708976 |
| C  | -1.507565 | -0.928843 | -1.479045 |
| H  | -0.486588 | -2.751793 | -1.199611 |
| H  | -1.377010 | -0.947855 | -2.553467 |
| H  | -2.278402 | -0.259997 | -1.120585 |
| B  | -1.022870 | 1.587190  | -0.000298 |
| C  | -0.091213 | 0.745046  | 0.768703  |
| C  | -0.091636 | 0.745285  | -0.769602 |
| Si | 1.475573  | 0.256641  | -0.000923 |
| C  | 2.097903  | -1.505357 | 0.000291  |
| H  | 3.189931  | -1.489163 | -0.008674 |
| H  | 1.770324  | -2.044943 | 0.888716  |
| H  | 1.755658  | -2.052741 | -0.877613 |
| C  | 2.890586  | 1.472026  | -0.001594 |
| H  | 3.519708  | 1.329420  | 0.880595  |
| H  | 3.517823  | 1.330568  | -0.885308 |
| H  | 2.515793  | 2.495450  | -0.000568 |
| C  | -2.312504 | 2.453969  | 0.001585  |
| H  | -2.029410 | 3.511190  | 0.030421  |
| H  | -2.912846 | 2.311186  | -0.899432 |
| H  | -2.934127 | 2.271117  | 0.880975  |

**TS<sub>A13-endo</sub>**

E= -784.00336

v= 390.02i

|   |           |           |           |
|---|-----------|-----------|-----------|
| C | -0.499004 | -1.765796 | -1.509476 |
| C | -1.488430 | -2.226051 | -0.680859 |
| H | -0.684372 | -1.654172 | -2.570365 |

|    |           |           |           |
|----|-----------|-----------|-----------|
| H  | 0.542247  | -1.834824 | -1.230142 |
| H  | -2.475584 | -2.385444 | -1.104551 |
| C  | -1.387371 | -2.268717 | 0.731498  |
| C  | -0.293016 | -1.847575 | 1.436681  |
| H  | -2.300797 | -2.468733 | 1.283815  |
| H  | -0.317429 | -1.801223 | 2.517864  |
| H  | 0.695393  | -1.869195 | 0.996747  |
| B  | 0.978863  | 0.391675  | 0.003448  |
| C  | -0.284945 | 0.380248  | -0.759264 |
| C  | -0.271749 | 0.377699  | 0.778323  |
| Si | -1.757035 | 1.093002  | 0.024724  |
| C  | -3.420464 | 0.243048  | 0.011665  |
| H  | -3.609757 | -0.227634 | -0.954133 |
| H  | -3.504910 | -0.517982 | 0.785748  |
| H  | -4.194192 | 0.995418  | 0.180606  |
| C  | -1.952506 | 2.948346  | 0.035746  |
| H  | -2.544380 | 3.276362  | -0.822674 |
| H  | -2.467964 | 3.276301  | 0.941928  |
| H  | -0.977954 | 3.434902  | -0.006533 |
| C  | 2.541503  | 0.287982  | -0.002628 |
| C  | 3.064079  | 1.631866  | -0.548350 |
| H  | 2.749195  | 2.469424  | 0.080496  |
| H  | 4.159412  | 1.621910  | -0.570367 |
| H  | 2.701406  | 1.813494  | -1.563151 |
| C  | 3.025359  | -0.836815 | -0.930973 |
| H  | 4.118765  | -0.821701 | -0.998761 |
| H  | 2.737026  | -1.824505 | -0.556940 |
| C  | 2.620360  | -0.720881 | -1.939979 |
| C  | 3.092195  | 0.066921  | 1.412196  |
| H  | 2.771970  | 0.865103  | 2.086088  |
| H  | 2.744161  | -0.880286 | 1.834056  |
| H  | 4.187665  | 0.046322  | 1.399523  |

**TS<sub>A5-exo</sub>**

E= -746.74404

v= 407.26i

|    |           |           |           |
|----|-----------|-----------|-----------|
| C  | -1.449797 | -0.603182 | -1.473633 |
| C  | -2.504337 | -0.182481 | -0.707806 |
| H  | -1.471212 | -0.477495 | -2.548295 |
| H  | -0.746826 | -1.338697 | -1.102526 |
| H  | -3.308147 | 0.356318  | -1.200143 |
| C  | -2.504361 | -0.181992 | 0.707876  |
| C  | -1.449841 | -0.602182 | 1.474015  |
| H  | -3.308149 | 0.357213  | 1.199809  |
| H  | -1.471263 | -0.475708 | 2.548589  |
| H  | -0.746931 | -1.338047 | 1.103482  |
| B  | -0.469707 | 1.969149  | -0.000553 |
| C  | 0.169961  | 0.901969  | -0.794645 |
| C  | 0.169919  | 0.902381  | 0.794123  |
| Si | 1.454653  | -0.002579 | -0.000002 |
| H  | -1.219086 | 2.874253  | -0.000785 |
| F  | 1.408891  | -1.596857 | 0.000387  |
| F  | 2.998414  | 0.355239  | -0.000045 |

**TS<sub>A6-exo</sub>**

E= -786.06913

v= 407.13i

|   |           |           |           |
|---|-----------|-----------|-----------|
| C | -1.024161 | -1.199978 | -1.469685 |
| C | -2.156839 | -1.064428 | -0.711560 |
| H | -1.070229 | -1.088138 | -2.545199 |
| H | -0.158728 | -1.730131 | -1.091984 |
| H | -3.071367 | -0.755480 | -1.208861 |
| C | -2.162623 | -1.062100 | 0.704983  |
| C | -1.036886 | -1.199565 | 1.472728  |
| H | -3.080222 | -0.748617 | 1.193773  |
| H | -1.090814 | -1.084056 | 2.547483  |
| H | -0.168457 | -1.730507 | 1.102850  |
| B | -0.767388 | 1.505018  | 0.006890  |
| C | 0.158769  | 0.664930  | -0.789261 |

|    |           |           |           |
|----|-----------|-----------|-----------|
| C  | 0.160788  | 0.663070  | 0.795925  |
| Si | 1.637193  | 0.130829  | 0.000757  |
| F  | 3.036742  | 0.877535  | 0.000292  |
| F  | 2.007054  | -1.421568 | -0.000820 |
| C  | -2.058948 | 2.352423  | -0.001347 |
| H  | -1.800651 | 3.402944  | -0.171751 |
| H  | -2.601007 | 2.293438  | 0.943221  |
| H  | -2.717065 | 2.054020  | -0.820523 |

**TS<sub>A7-exo</sub>**

E= -903.97660

v= 402.23i

|    |           |           |           |
|----|-----------|-----------|-----------|
| C  | -0.764607 | 1.831631  | -1.442761 |
| C  | 0.253140  | 2.409815  | -0.732366 |
| H  | -0.714711 | 1.782569  | -2.522936 |
| H  | -1.753406 | 1.724607  | -1.015324 |
| H  | 1.134492  | 2.730199  | -1.278712 |
| C  | 0.339209  | 2.397637  | 0.681319  |
| C  | -0.595030 | 1.820888  | 1.499387  |
| H  | 1.284702  | 2.704656  | 1.119696  |
| H  | -0.421101 | 1.749673  | 2.565239  |
| H  | -1.626018 | 1.719148  | 1.184072  |
| B  | 0.740114  | -0.550073 | -0.005136 |
| C  | -0.496732 | -0.394171 | 0.793805  |
| C  | -0.509163 | -0.364463 | -0.788916 |
| Si | -2.008093 | -0.829478 | 0.008892  |
| F  | -3.234485 | 0.191819  | 0.043367  |
| F  | -2.686727 | -2.263560 | -0.013397 |
| C  | 2.290509  | -0.690022 | -0.003171 |
| C  | 2.958607  | 0.233454  | -1.031534 |
| H  | 4.020858  | -0.018224 | -1.122166 |
| H  | 2.496290  | 0.133114  | -2.017077 |
| H  | 2.891689  | 1.280500  | -0.726962 |
| C  | 2.874974  | -0.437945 | 1.391963  |
| H  | 2.437008  | -1.114238 | 2.129916  |
| H  | 3.959357  | -0.592509 | 1.385028  |
| H  | 2.680737  | 0.585897  | 1.722293  |
| C  | 2.552898  | -2.157517 | -0.410538 |
| H  | 2.090953  | -2.859994 | 0.288712  |
| H  | 2.168197  | -2.367003 | -1.411760 |
| H  | 3.631766  | -2.345512 | -0.411680 |

**TS<sub>A8-exo</sub>**

E= -802.15531

v= 393.46i

|    |           |           |           |
|----|-----------|-----------|-----------|
| C  | -1.083781 | -1.193679 | -1.469325 |
| C  | -2.203150 | -1.003356 | -0.709410 |
| H  | -1.125473 | -1.077158 | -2.544637 |
| H  | -0.232618 | -1.745746 | -1.091172 |
| H  | -3.102696 | -0.645810 | -1.200935 |
| C  | -2.203149 | -1.003357 | 0.709411  |
| C  | -1.083779 | -1.193680 | 1.469324  |
| H  | -3.102695 | -0.645813 | 1.200937  |
| H  | -1.125471 | -1.077162 | 2.544636  |
| H  | -0.232617 | -1.745747 | 1.091169  |
| B  | -0.735026 | 1.560707  | 0.000000  |
| C  | 0.154585  | 0.664669  | -0.784908 |
| C  | 0.154585  | 0.664668  | 0.784908  |
| Si | 1.618638  | 0.100197  | 0.000000  |
| F  | 3.049972  | 0.789242  | 0.000000  |
| F  | 1.941331  | -1.464796 | -0.000001 |
| N  | -1.838872 | 2.392262  | 0.000001  |
| H  | -2.262861 | 2.726853  | 0.848873  |
| H  | -2.262861 | 2.726855  | -0.848872 |

**TS<sub>A9-exo</sub>**

E= -1083.78994

v= 388.37i

|   |           |          |           |
|---|-----------|----------|-----------|
| C | -0.413499 | 1.796680 | -1.468384 |
|---|-----------|----------|-----------|

|    |           |           |           |
|----|-----------|-----------|-----------|
| C  | 0.658431  | 2.187976  | -0.714144 |
| H  | -0.326102 | 1.721655  | -2.544585 |
| H  | -1.423688 | 1.849415  | -1.080595 |
| H  | 1.611229  | 2.326232  | -1.214343 |
| C  | 0.675133  | 2.182125  | 0.704591  |
| C  | -0.380867 | 1.791119  | 1.481087  |
| H  | 1.639710  | 2.315252  | 1.184337  |
| H  | -0.269667 | 1.707953  | 2.554433  |
| H  | -1.399331 | 1.847852  | 1.115868  |
| B  | 0.614145  | -0.727093 | 0.001189  |
| C  | -0.572505 | -0.433673 | -0.799559 |
| C  | -0.571749 | -0.438599 | 0.802571  |
| Si | -2.126549 | -0.675698 | 0.001669  |
| F  | -2.972659 | -2.011377 | -0.000784 |
| F  | -3.195268 | 0.502890  | 0.006002  |
| C  | 2.196213  | -0.807452 | -0.000537 |
| F  | 2.602824  | -2.085186 | -0.112630 |
| F  | 2.744034  | -0.128574 | -1.024121 |
| F  | 2.745722  | -0.315772 | 1.122847  |

**TS<sub>A10-exo</sub>**

E= -951.24724

v= 363.65i

|    |           |           |           |
|----|-----------|-----------|-----------|
| C  | -0.009866 | 1.779505  | -1.474633 |
| C  | 1.077848  | 2.089048  | -0.710453 |
| H  | 0.080586  | 1.696549  | -2.550113 |
| H  | -1.017985 | 1.889554  | -1.093374 |
| H  | 2.045785  | 2.155522  | -1.195382 |
| C  | 1.077979  | 2.089074  | 0.710218  |
| C  | -0.009580 | 1.779529  | 1.474617  |
| H  | 2.046005  | 2.155592  | 1.194962  |
| H  | 0.081084  | 1.696619  | 2.550084  |
| H  | -1.017780 | 1.889484  | 1.093554  |
| B  | 0.826328  | -0.899405 | -0.000008 |
| C  | -0.304009 | -0.456616 | 0.802127  |
| C  | -0.304039 | -0.456579 | -0.802078 |
| Si | -1.872064 | -0.582131 | 0.000046  |
| F  | -2.846414 | 0.673827  | 0.000124  |
| F  | -2.811725 | -1.851585 | -0.000044 |
| N  | 2.299816  | -1.194529 | -0.000002 |
| O  | 3.056418  | -0.241843 | 0.000163  |
| O  | 2.632844  | -2.360494 | -0.000141 |

**TS<sub>A11-exo</sub>**

E= -626.76860

v= 427.48i

|    |           |           |           |
|----|-----------|-----------|-----------|
| C  | 1.561940  | 0.550037  | -1.472981 |
| C  | 2.622548  | 0.136906  | -0.706591 |
| H  | 1.579763  | 0.419275  | -2.547054 |
| H  | 0.875111  | 1.301860  | -1.109545 |
| H  | 3.422555  | -0.408334 | -1.198237 |
| C  | 2.622414  | 0.137240  | 0.706749  |
| C  | 1.561650  | 0.550711  | 1.472746  |
| H  | 3.422327  | -0.407771 | 1.198802  |
| H  | 1.579290  | 0.420455  | 2.546884  |
| H  | 0.874889  | 1.302382  | 1.108853  |
| B  | 0.553815  | -1.922531 | 0.000291  |
| C  | -0.098183 | -0.852513 | 0.769294  |
| C  | -0.098191 | -0.852792 | -0.769085 |
| Si | -1.480857 | 0.029202  | -0.000050 |
| C  | -1.580527 | 1.894544  | -0.000284 |
| H  | -2.139206 | 2.222563  | 0.880257  |
| H  | -0.621912 | 2.410962  | -0.001238 |
| H  | -2.140765 | 2.222213  | -0.879964 |
| C  | -3.189348 | -0.711105 | 0.000095  |
| H  | -3.748901 | -0.392873 | 0.883029  |
| H  | -3.748943 | -0.393136 | -0.882906 |
| H  | -3.129182 | -1.799454 | 0.000258  |
| H  | 1.324085  | -2.812482 | 0.000442  |

**TS<sub>A12</sub>-exo**

E= -666.09275

v= 421.19i

|    |           |           |           |
|----|-----------|-----------|-----------|
| C  | 1.211849  | -1.117222 | 1.481496  |
| C  | 2.324437  | -0.963490 | 0.693872  |
| H  | 1.275792  | -0.979186 | 2.552999  |
| H  | 0.365659  | -1.696987 | 1.139761  |
| H  | 3.237988  | -0.610826 | 1.163391  |
| C  | 2.296955  | -0.983292 | -0.720199 |
| C  | 1.152351  | -1.150108 | -1.459128 |
| H  | 3.192635  | -0.648585 | -1.235020 |
| H  | 1.177599  | -1.045604 | -2.536024 |
| H  | 0.321638  | -1.722952 | -1.070367 |
| B  | 0.776338  | 1.478398  | -0.001357 |
| C  | -0.129483 | 0.609059  | 0.771525  |
| C  | -0.128405 | 0.595967  | -0.764355 |
| Si | -1.677907 | 0.065343  | 0.007722  |
| C  | -3.179575 | 1.169906  | -0.003921 |
| H  | -3.782073 | 1.010478  | 0.893658  |
| H  | -2.880102 | 2.217446  | -0.040177 |
| H  | -3.808756 | 0.955949  | -0.871425 |
| C  | -2.194791 | -1.730721 | 0.009716  |
| H  | -2.896425 | -1.901462 | 0.830122  |
| H  | -2.723443 | -1.954890 | -0.920494 |
| H  | -1.379301 | -2.445335 | 0.112258  |
| C  | 2.050667  | 2.358139  | -0.015262 |
| H  | 2.701122  | 2.095584  | -0.852875 |
| H  | 1.769479  | 3.408152  | -0.146602 |
| H  | 2.613161  | 2.282002  | 0.917015  |

**TS<sub>A13</sub>-exo**

E= -783.99993

v= 418.49i

|    |           |           |           |
|----|-----------|-----------|-----------|
| C  | -0.323507 | 1.885980  | -1.507485 |
| C  | 0.614089  | 2.414475  | -0.657763 |
| H  | -0.116849 | 1.795896  | -2.566100 |
| H  | -1.369267 | 1.862226  | -1.234801 |
| H  | 1.590327  | 2.662282  | -1.065153 |
| C  | 0.484735  | 2.431685  | 0.750383  |
| C  | -0.583302 | 1.899159  | 1.427724  |
| H  | 1.367461  | 2.695652  | 1.324324  |
| H  | -0.569027 | 1.843869  | 2.508596  |
| H  | -1.565571 | 1.875842  | 0.977036  |
| B  | 0.718196  | -0.537825 | 0.010281  |
| C  | -0.508474 | -0.305017 | -0.772838 |
| C  | -0.527731 | -0.259389 | 0.759719  |
| Si | -2.100284 | -0.713509 | -0.019924 |
| C  | -2.709954 | -2.474118 | 0.022797  |
| H  | -3.248915 | -2.717427 | -0.896096 |
| H  | -1.871645 | -3.163492 | 0.125773  |
| H  | -3.393604 | -2.627721 | 0.861244  |
| C  | -3.544738 | 0.473953  | -0.056507 |
| H  | -4.294514 | 0.094363  | -0.755262 |
| H  | -4.012059 | 0.517065  | 0.930840  |
| H  | -3.295271 | 1.491405  | -0.355357 |
| C  | 2.258664  | -0.789603 | 0.008874  |
| C  | 2.412030  | -2.280555 | 0.382209  |
| H  | 1.896704  | -2.929056 | -0.332238 |
| H  | 3.473374  | -2.552416 | 0.377978  |
| H  | 2.011434  | -2.482618 | 1.379035  |
| C  | 2.995847  | 0.056251  | 1.055609  |
| H  | 4.035654  | -0.278586 | 1.142586  |
| H  | 3.009439  | 1.111379  | 0.773682  |
| H  | 2.523666  | -0.027692 | 2.038116  |
| C  | 2.863499  | -0.554414 | -1.380558 |
| H  | 2.372895  | -1.178081 | -2.131741 |
| H  | 2.748671  | 0.487875  | -1.688923 |
| H  | 3.933153  | -0.792955 | -1.378986 |

**C-1**

E= -1199.64585

v= 141.85i

|    |           |           |           |
|----|-----------|-----------|-----------|
| B  | 0.000000  | 0.000000  | 0.000000  |
| B  | 0.000000  | 1.698513  | 0.000000  |
| C  | -0.729053 | 2.978219  | 0.000000  |
| C  | 0.729053  | 2.978219  | 0.000000  |
| Si | 0.000000  | 4.627440  | 0.000000  |
| H  | 0.000000  | 5.421334  | 1.234829  |
| H  | 0.000000  | 5.421334  | -1.234829 |
| B  | 1.470955  | -0.849256 | 0.000000  |
| C  | 2.214687  | -2.120487 | 0.000000  |
| C  | 2.943739  | -0.857731 | 0.000000  |
| Si | 4.007480  | -2.313720 | 0.000000  |
| H  | 4.695013  | -2.710667 | -1.234829 |
| H  | 4.695013  | -2.710667 | 1.234829  |
| B  | -1.470955 | -0.849256 | 0.000000  |
| C  | -2.214687 | -2.120487 | 0.000000  |
| C  | -2.943739 | -0.857731 | 0.000000  |
| Si | -4.007480 | -2.313720 | 0.000000  |
| H  | -4.695013 | -2.710667 | -1.234829 |
| H  | -4.695013 | -2.710667 | 1.234829  |

**C-2**

E= -1199.68543

v= 24.41

|    |           |           |           |
|----|-----------|-----------|-----------|
| B  | 0.000000  | 0.000000  | 0.000000  |
| B  | 0.000000  | 1.640638  | 0.000000  |
| C  | 0.000000  | 2.931368  | 0.718011  |
| C  | 0.000000  | 2.931368  | -0.718011 |
| Si | 0.000000  | 4.580833  | 0.000000  |
| H  | 1.232803  | 5.377937  | 0.000000  |
| H  | -1.232803 | 5.377937  | 0.000000  |
| B  | 1.420834  | -0.820319 | 0.000000  |
| C  | 2.538639  | -1.465684 | 0.718011  |
| C  | 2.538639  | -1.465684 | -0.718011 |
| Si | 3.967118  | -2.290417 | 0.000000  |
| H  | 4.041028  | -3.756607 | 0.000000  |
| H  | 5.273831  | -1.621330 | 0.000000  |
| B  | -1.420834 | -0.820319 | 0.000000  |
| C  | -2.538639 | -1.465684 | 0.718011  |
| C  | -2.538639 | -1.465684 | -0.718011 |
| Si | -3.967118 | -2.290417 | 0.000000  |
| H  | -5.273831 | -1.621330 | 0.000000  |
| H  | -4.041028 | -3.756607 | 0.000000  |

**D1**

E= -7191.08093

v= 4.11

|    |           |           |           |
|----|-----------|-----------|-----------|
| B  | 4.465837  | 9.574274  | 0.000000  |
| B  | 4.861437  | 11.166263 | 0.000000  |
| C  | 5.170818  | 12.418118 | 0.718233  |
| C  | 5.170818  | 12.418118 | -0.718233 |
| Si | 5.569226  | 14.019275 | 0.000000  |
| H  | 6.958125  | 14.494660 | 0.000000  |
| H  | 4.563994  | 15.089233 | 0.000000  |
| B  | 5.645619  | 8.434004  | 0.000000  |
| C  | 6.571371  | 7.530811  | 0.715597  |
| C  | 6.571371  | 7.530811  | -0.715597 |
| Si | 7.760494  | 6.375120  | 0.000000  |
| H  | 9.195823  | 6.700279  | 0.000000  |
| B  | 2.888271  | 9.122718  | 0.000000  |
| C  | 1.643076  | 8.773001  | 0.715628  |
| C  | 1.643076  | 8.773001  | -0.715628 |
| Si | 0.046516  | 8.324749  | 0.000000  |
| H  | -0.391671 | 6.919778  | 0.000000  |
| Si | 7.232702  | 4.122090  | 0.000000  |
| C  | 8.419180  | 2.963555  | 0.715628  |

|    |            |            |           |
|----|------------|------------|-----------|
| C  | 8.419180   | 2.963555   | -0.715628 |
| H  | 5.796868   | 3.799086   | 0.000000  |
| B  | 9.344641   | 2.060043   | 0.000000  |
| B  | 10.524483  | 0.919608   | 0.000000  |
| B  | 10.126872  | -0.672247  | 0.000000  |
| B  | 12.100986  | 1.373004   | 0.000000  |
| C  | 9.807560   | -1.925569  | 0.715597  |
| C  | 9.807560   | -1.925569  | -0.715597 |
| C  | 13.339815  | 1.730999   | 0.718233  |
| C  | 13.339815  | 1.730999   | -0.718233 |
| Si | 9.401263   | -3.533225  | 0.000000  |
| Si | 14.925661  | 2.186546   | 0.000000  |
| H  | 10.400524  | -4.613677  | 0.000000  |
| H  | 16.031806  | 1.221417   | 0.000000  |
| H  | 15.349656  | 3.592082   | 0.000000  |
| Si | 7.186186   | -4.202659  | 0.000000  |
| C  | 6.776104   | -5.809446  | 0.715628  |
| C  | 6.776104   | -5.809446  | -0.715628 |
| H  | 6.188539   | -3.120692  | 0.000000  |
| B  | 6.456370   | -7.062675  | 0.000000  |
| B  | 6.058646   | -8.654666  | 0.000000  |
| B  | 4.481252   | -9.106252  | 0.000000  |
| B  | 7.239549   | -9.793259  | 0.000000  |
| C  | 3.236188   | -9.456380  | 0.715597  |
| C  | 3.236188   | -9.456380  | -0.715597 |
| C  | 8.168997   | -10.687119 | 0.718233  |
| C  | 8.168997   | -10.687119 | -0.718233 |
| Si | 1.640768   | -9.908345  | 0.000000  |
| Si | 9.356435   | -11.832729 | 0.000000  |
| H  | 1.204701   | -11.313956 | 0.000000  |
| H  | 9.073681   | -13.273243 | 0.000000  |
| H  | 10.785662  | -11.497151 | 0.000000  |
| Si | -0.046516  | -8.324749  | 0.000000  |
| C  | -1.643076  | -8.773001  | 0.715628  |
| C  | -1.643076  | -8.773001  | -0.715628 |
| H  | 0.391671   | -6.919778  | 0.000000  |
| B  | -2.888271  | -9.122718  | 0.000000  |
| B  | -4.465837  | -9.574274  | 0.000000  |
| B  | -5.645619  | -8.434004  | 0.000000  |
| B  | -4.861437  | -11.166263 | 0.000000  |
| C  | -6.571371  | -7.530811  | 0.715597  |
| C  | -6.571371  | -7.530811  | -0.715597 |
| C  | -5.170818  | -12.418118 | 0.718233  |
| C  | -5.170818  | -12.418118 | -0.718233 |
| Si | -7.760494  | -6.375120  | 0.000000  |
| Si | -5.569226  | -14.019275 | 0.000000  |
| H  | -9.195823  | -6.700279  | 0.000000  |
| H  | -6.958125  | -14.494660 | 0.000000  |
| H  | -4.563994  | -15.089233 | 0.000000  |
| Si | -7.232702  | -4.122090  | 0.000000  |
| C  | -8.419180  | -2.963555  | 0.715628  |
| C  | -8.419180  | -2.963555  | -0.715628 |
| H  | -5.796868  | -3.799086  | 0.000000  |
| B  | -9.344641  | -2.060043  | 0.000000  |
| B  | -10.524483 | -0.919608  | 0.000000  |
| B  | -10.126872 | 0.672247   | 0.000000  |
| B  | -12.100986 | -1.373004  | 0.000000  |
| C  | -9.807560  | 1.925569   | 0.715597  |
| C  | -9.807560  | 1.925569   | -0.715597 |
| C  | -13.339815 | -1.730999  | 0.718233  |
| C  | -13.339815 | -1.730999  | -0.718233 |
| Si | -9.401263  | 3.533225   | 0.000000  |
| Si | -14.925661 | -2.186546  | 0.000000  |
| H  | -10.400524 | 4.613677   | 0.000000  |
| H  | -16.031806 | -1.221417  | 0.000000  |
| H  | -15.349656 | -3.592082  | 0.000000  |
| Si | -7.186186  | 4.202659   | 0.000000  |
| C  | -6.776104  | 5.809446   | 0.715628  |
| C  | -6.776104  | 5.809446   | -0.715628 |

|    |            |           |           |
|----|------------|-----------|-----------|
| H  | -6.188539  | 3.120692  | 0.000000  |
| B  | -6.456370  | 7.062675  | 0.000000  |
| B  | -6.058646  | 8.654666  | 0.000000  |
| B  | -4.481252  | 9.106252  | 0.000000  |
| B  | -7.239549  | 9.793259  | 0.000000  |
| C  | -3.236188  | 9.456380  | 0.715597  |
| C  | -3.236188  | 9.456380  | -0.715597 |
| C  | -8.168997  | 10.687119 | 0.718233  |
| C  | -8.168997  | 10.687119 | -0.718233 |
| Si | -1.640768  | 9.908345  | 0.000000  |
| Si | -9.356435  | 11.832729 | 0.000000  |
| H  | -1.204701  | 11.313956 | 0.000000  |
| H  | -9.073681  | 13.273243 | 0.000000  |
| H  | -10.785662 | 11.497151 | 0.000000  |

## D2

E= -11983.96254

v= 2.10

|    |           |           |           |
|----|-----------|-----------|-----------|
| B  | 10.566045 | 9.150068  | 0.000000  |
| B  | 12.176413 | 9.462898  | 0.000000  |
| C  | 13.441945 | 9.709998  | 0.718231  |
| C  | 13.441945 | 9.709998  | -0.718231 |
| Si | 15.061850 | 10.023806 | 0.000000  |
| H  | 16.078265 | 8.964674  | 0.000000  |
| H  | 15.608005 | 11.386535 | 0.000000  |
| B  | 10.030679 | 7.599072  | 0.000000  |
| C  | 9.603282  | 6.378205  | 0.715582  |
| C  | 9.603282  | 6.378205  | -0.715582 |
| Si | 9.059773  | 4.811955  | 0.000000  |
| H  | 9.960407  | 3.648013  | 0.000000  |
| B  | 9.490563  | 10.389375 | 0.000000  |
| C  | 8.647159  | 11.369819 | 0.715633  |
| C  | 8.647159  | 11.369819 | -0.715633 |
| Si | 7.565060  | 12.626574 | 0.000000  |
| H  | 6.106845  | 12.427404 | 0.000000  |
| Si | 6.794951  | 4.337258  | 0.000000  |
| C  | 6.246718  | 2.771642  | 0.715678  |
| C  | 6.246718  | 2.771642  | -0.715678 |
| H  | 5.892099  | 5.499526  | 0.000000  |
| B  | 5.819115  | 1.551718  | 0.000000  |
| B  | 5.282428  | 0.001200  | 0.000000  |
| B  | 3.671373  | -0.310218 | 0.000000  |
| B  | 6.357095  | -1.238759 | 0.000000  |
| C  | 2.401072  | -0.551106 | 0.715641  |
| C  | 2.401072  | -0.551106 | -0.715641 |
| C  | 7.200123  | -2.218821 | 0.715674  |
| C  | 7.200123  | -2.218821 | -0.715674 |
| Si | 0.772062  | -0.861806 | 0.000000  |
| Si | 8.282725  | -3.475535 | 0.000000  |
| H  | 0.216372  | -2.224513 | 0.000000  |
| H  | 9.740634  | -3.274814 | 0.000000  |
| Si | -0.772062 | 0.861806  | 0.000000  |
| C  | -2.401072 | 0.551106  | 0.715641  |
| C  | -2.401072 | 0.551106  | -0.715641 |
| H  | -0.216372 | 2.224513  | 0.000000  |
| B  | -3.671373 | 0.310218  | 0.000000  |
| B  | -5.282428 | -0.001200 | 0.000000  |
| B  | -6.357095 | 1.238759  | 0.000000  |
| B  | -5.819115 | -1.551718 | 0.000000  |
| C  | -7.200123 | 2.218821  | 0.715674  |
| C  | -7.200123 | 2.218821  | -0.715674 |
| C  | -6.246718 | -2.771642 | 0.715678  |
| C  | -6.246718 | -2.771642 | -0.715678 |
| Si | -8.282725 | 3.475535  | 0.000000  |
| Si | -6.794951 | -4.337258 | 0.000000  |
| H  | -9.740634 | 3.274814  | 0.000000  |
| H  | -5.892099 | -5.499526 | 0.000000  |
| Si | -7.561685 | 5.674400  | 0.000000  |
| C  | -8.645602 | 6.928998  | 0.715601  |

|    |            |            |           |                 |            |            |           |
|----|------------|------------|-----------|-----------------|------------|------------|-----------|
| C  | -8.645602  | 6.928998   | -0.715601 | H               | 5.891530   | -12.796868 | 0.000000  |
| H  | -6.103389  | 5.872393   | 0.000000  | B               | 5.818476   | -16.746690 | 0.000000  |
| B  | -9.489952  | 7.908995   | 0.000000  | B               | 5.283245   | -18.297797 | 0.000000  |
| B  | -10.565965 | 9.147854   | 0.000000  | B               | 3.672310   | -18.609733 | 0.000000  |
| B  | -10.030259 | 10.698738  | 0.000000  | B               | 6.359551   | -19.535794 | 0.000000  |
| B  | -12.176404 | 8.835491   | 0.000000  | C               | 2.401447   | -18.849768 | 0.715593  |
| C  | -9.602504  | 11.919189  | 0.715613  | C               | 2.401447   | -18.849768 | -0.715593 |
| C  | -9.602504  | 11.919189  | -0.715613 | C               | 7.206848   | -20.507821 | 0.718238  |
| C  | -13.442083 | 8.589150   | 0.718231  | C               | 7.206848   | -20.507821 | -0.718238 |
| C  | -13.442083 | 8.589150   | -0.718231 | Si              | 0.772784   | -19.161167 | 0.000000  |
| Si | -9.057474  | 13.485346  | 0.000000  | Si              | 8.289438   | -21.753028 | 0.000000  |
| Si | -15.062351 | 8.277154   | 0.000000  | H               | 0.216686   | -20.523800 | 0.000000  |
| H  | -9.959450  | 14.648299  | 0.000000  | H               | 7.881565   | -23.163203 | 0.000000  |
| H  | -16.077690 | 9.337294   | 0.000000  | H               | 9.742542   | -21.543863 | 0.000000  |
| H  | -15.609816 | 6.914938   | 0.000000  | Si              | -0.771647  | -17.438048 | 0.000000  |
| Si | -6.792825  | 13.960444  | 0.000000  | C               | -2.400913  | -17.747061 | 0.715612  |
| C  | -6.245755  | 15.525888  | 0.715617  | C               | -2.400913  | -17.747061 | -0.715612 |
| C  | -6.245755  | 15.525888  | -0.715617 | H               | -0.215198  | -16.075487 | 0.000000  |
| H  | -5.891530  | 12.796868  | 0.000000  | B               | -3.671729  | -17.987542 | 0.000000  |
| B  | -5.818476  | 16.746690  | 0.000000  | B               | -5.282673  | -18.299864 | 0.000000  |
| B  | -5.283245  | 18.297797  | 0.000000  | B               | -6.358171  | -17.060655 | 0.000000  |
| B  | -3.672310  | 18.609733  | 0.000000  | B               | -5.816371  | -19.851005 | 0.000000  |
| B  | -6.359551  | 19.535794  | 0.000000  | C               | -7.201484  | -16.080032 | 0.715601  |
| C  | -2.401447  | 18.849768  | 0.715593  | C               | -7.201484  | -16.080032 | -0.715601 |
| C  | -2.401447  | 18.849768  | -0.715593 | C               | -6.234260  | -21.070904 | 0.718236  |
| C  | -7.206848  | 20.507821  | 0.718238  | C               | -6.234260  | -21.070904 | -0.718236 |
| C  | -7.206848  | 20.507821  | -0.718238 | Si              | -8.285735  | -14.825491 | 0.000000  |
| Si | -0.772784  | 19.161167  | 0.000000  | Si              | -6.771060  | -22.631160 | 0.000000  |
| Si | -8.289438  | 21.753028  | 0.000000  | H               | -9.743881  | -15.024672 | 0.000000  |
| H  | -0.216686  | 20.523800  | 0.000000  | H               | -8.196189  | -22.983265 | 0.000000  |
| H  | -7.881565  | 23.163203  | 0.000000  | H               | -5.863013  | -23.784789 | 0.000000  |
| H  | -9.742542  | 21.543863  | 0.000000  | Si              | -7.565060  | -12.626574 | 0.000000  |
| Si | 0.771647   | 17.438048  | 0.000000  | C               | -8.647159  | -11.369819 | 0.715633  |
| C  | 2.400913   | 17.747061  | 0.715612  | C               | -8.647159  | -11.369819 | -0.715633 |
| C  | 2.400913   | 17.747061  | -0.715612 | H               | -6.106845  | -12.427404 | 0.000000  |
| H  | 0.215198   | 16.075487  | 0.000000  | B               | -9.490563  | -10.389375 | 0.000000  |
| B  | 3.671729   | 17.987542  | 0.000000  | B               | -10.566045 | -9.150068  | 0.000000  |
| B  | 5.282673   | 18.299864  | 0.000000  | B               | -10.030679 | -7.599072  | 0.000000  |
| B  | 6.358171   | 17.060655  | 0.000000  | B               | -12.176413 | -9.462898  | 0.000000  |
| B  | 5.816371   | 19.851005  | 0.000000  | C               | -9.603282  | -6.378205  | 0.715582  |
| C  | 7.201484   | 16.080032  | 0.715601  | C               | -9.603282  | -6.378205  | -0.715582 |
| C  | 7.201484   | 16.080032  | -0.715601 | C               | -13.441945 | -9.709998  | 0.718231  |
| C  | 6.234260   | 21.070904  | 0.718236  | C               | -13.441945 | -9.709998  | -0.718231 |
| C  | 6.234260   | 21.070904  | -0.718236 | Si              | -9.059773  | -4.811955  | 0.000000  |
| Si | 8.285735   | 14.825491  | 0.000000  | Si              | -15.061850 | -10.023806 | 0.000000  |
| Si | 6.771060   | 22.631160  | 0.000000  | H               | -9.960407  | -3.648013  | 0.000000  |
| H  | 9.743881   | 15.024672  | 0.000000  | H               | -16.078265 | -8.964674  | 0.000000  |
| H  | 8.196189   | 22.983265  | 0.000000  | H               | -15.608005 | -11.386535 | 0.000000  |
| H  | 5.863013   | 23.784789  | 0.000000  |                 |            |            |           |
| B  | 10.565965  | -9.147854  | 0.000000  | <b>D3</b>       |            |            |           |
| B  | 12.176404  | -8.835491  | 0.000000  | E= -15578.33056 |            |            |           |
| C  | 13.442083  | -8.589150  | 0.718231  | v= 1.69         |            |            |           |
| C  | 13.442083  | -8.589150  | -0.718231 | B               | -6.373423  | 8.423922   | 0.000000  |
| Si | 15.062351  | -8.277154  | 0.000000  | B               | -6.037823  | 10.030014  | 0.000000  |
| H  | 16.077690  | -9.337294  | 0.000000  | C               | -5.769112  | 11.294518  | 0.715677  |
| H  | 15.609816  | -6.914938  | 0.000000  | C               | -5.769112  | 11.294518  | -0.715677 |
| B  | 10.030259  | -10.698738 | 0.000000  | Si              | -5.425518  | 12.917272  | 0.000000  |
| C  | 9.602504   | -11.919189 | 0.715613  | H               | -6.468832  | 13.955170  | 0.000000  |
| C  | 9.602504   | -11.919189 | -0.715613 | B               | -5.151481  | 7.328934   | 0.000000  |
| Si | 9.057474   | -13.485346 | 0.000000  | C               | -4.192594  | 6.461523   | 0.715641  |
| H  | 9.959450   | -14.648299 | 0.000000  | C               | -4.192594  | 6.461523   | -0.715641 |
| B  | 9.489952   | -7.908995  | 0.000000  | Si              | -2.962019  | 5.349881   | 0.000000  |
| C  | 8.645602   | -6.928998  | 0.715601  | H               | -1.539763  | 5.727736   | 0.000000  |
| C  | 8.645602   | -6.928998  | -0.715601 | B               | -7.932450  | 7.912102   | 0.000000  |
| Si | 7.561685   | -5.674400  | 0.000000  | C               | -9.161953  | 7.512979   | 0.715677  |
| H  | 6.103389   | -5.872393  | 0.000000  | C               | -9.161953  | 7.512979   | -0.715677 |
| Si | 6.792825   | -13.960444 | 0.000000  | Si              | -10.739257 | 6.999410   | 0.000000  |
| C  | 6.245755   | -15.525888 | 0.715617  | H               | -11.115711 | 5.576751   | 0.000000  |
| C  | 6.245755   | -15.525888 | -0.715617 | Si              | -3.406947  | 3.079055   | 0.000000  |
|    |            |            |           | C               | -2.177353  | 1.966045   | 0.715665  |

|    |            |            |           |    |            |            |           |
|----|------------|------------|-----------|----|------------|------------|-----------|
| C  | -2.177353  | 1.966045   | -0.715665 | B  | -16.853833 | 7.080084   | 0.000000  |
| H  | -4.829224  | 2.701275   | 0.000000  | B  | -15.295383 | 7.593499   | 0.000000  |
| B  | -1.219707  | 1.097543   | 0.000000  | B  | -18.077907 | 8.172122   | 0.000000  |
| B  | 0.000000   | 0.000000   | 0.000000  | C  | -14.065290 | 7.993594   | 0.715576  |
| B  | -0.340646  | -1.605068  | 0.000000  | C  | -14.065290 | 7.993594   | -0.715576 |
| B  | 1.560353   | 0.507526   | 0.000000  | C  | -19.041219 | 9.029240   | 0.718242  |
| C  | -0.613969  | -2.868666  | 0.715665  | C  | -19.041219 | 9.029240   | -0.718242 |
| C  | -0.613969  | -2.868666  | -0.715665 | Si | -12.490577 | 8.511862   | 0.000000  |
| C  | 2.791322   | 0.902621   | 0.715665  | Si | -20.272656 | 10.127533  | 0.000000  |
| C  | 2.791322   | 0.902621   | -0.715665 | H  | -12.111444 | 9.933757   | 0.000000  |
| Si | -0.963067  | -4.490030  | 0.000000  | H  | -20.046213 | 11.577991  | 0.000000  |
| Si | 4.370013   | 1.410975   | 0.000000  | H  | -21.687563 | 9.736143   | 0.000000  |
| H  | 0.075239   | -5.532868  | 0.000000  | B  | 10.482042  | 1.307585   | 0.000000  |
| H  | 4.753985   | 2.831593   | 0.000000  | B  | 10.818306  | 2.913652   | 0.000000  |
| Si | -3.152123  | -5.240124  | 0.000000  | C  | 11.087407  | 4.177995   | 0.715677  |
| C  | -3.499546  | -6.861654  | 0.715641  | C  | 11.087407  | 4.177995   | -0.715677 |
| C  | -3.499546  | -6.861654  | -0.715641 | Si | 11.431295  | 5.800765   | 0.000000  |
| H  | -4.190484  | -4.197342  | 0.000000  | H  | 10.387464  | 6.838113   | 0.000000  |
| B  | -3.771303  | -8.125780  | 0.000000  | B  | 11.705158  | 0.213901   | 0.000000  |
| B  | -4.108619  | -9.731507  | 0.000000  | C  | 12.665895  | -0.651062  | 0.715677  |
| B  | -5.667336  | -10.243915 | 0.000000  | C  | 12.665895  | -0.651062  | -0.715677 |
| B  | -2.885856  | -10.825754 | 0.000000  | Si | 13.899445  | -1.760000  | 0.000000  |
| C  | -6.896783  | -10.643456 | 0.715677  | H  | 15.319948  | -1.375412  | 0.000000  |
| C  | -6.896783  | -10.643456 | -0.715677 | B  | 8.922783   | 0.796846   | 0.000000  |
| C  | -1.925454  | -11.690974 | 0.715677  | C  | 7.692139   | 0.400131   | 0.715641  |
| C  | -1.925454  | -11.690974 | -0.715677 | C  | 7.692139   | 0.400131   | -0.715641 |
| Si | -8.473927  | -11.157273 | 0.000000  | Si | 6.114142   | -0.109757  | 0.000000  |
| Si | -0.692038  | -12.800174 | 0.000000  | H  | 5.730246   | -1.530395  | 0.000000  |
| H  | -8.851116  | -12.579758 | 0.000000  | Si | 13.464349  | -4.032748  | 0.000000  |
| H  | 0.728248   | -12.414864 | 0.000000  | C  | 14.699227  | -5.138979  | 0.715592  |
| Si | -10.224636 | -9.644094  | 0.000000  | C  | 14.699227  | -5.138979  | -0.715592 |
| C  | -11.800100 | -10.160415 | 0.715592  | H  | 12.043196  | -4.414824  | 0.000000  |
| C  | -11.800100 | -10.160415 | -0.715592 | B  | 15.661362  | -6.003657  | 0.000000  |
| H  | -9.844948  | -8.222302  | 0.000000  | B  | 16.885720  | -7.096215  | 0.000000  |
| B  | -13.030001 | -10.561309 | 0.000000  | B  | 16.549521  | -8.702182  | 0.000000  |
| B  | -14.588363 | -11.075355 | 0.000000  | B  | 18.443688  | -6.582856  | 0.000000  |
| B  | -15.811071 | -9.981214  | 0.000000  | C  | 16.277722  | -9.966548  | 0.715608  |
| B  | -14.922764 | -12.681275 | 0.000000  | C  | 16.277722  | -9.966548  | -0.715608 |
| C  | -16.770144 | -9.113647  | 0.715608  | C  | 19.668113  | -6.178651  | 0.718240  |
| C  | -16.770144 | -9.113647  | -0.715608 | C  | 19.668113  | -6.178651  | -0.718240 |
| C  | -15.184925 | -13.943760 | 0.718240  | Si | 15.932172  | -11.588435 | 0.000000  |
| C  | -15.184925 | -13.943760 | -0.718240 | Si | 21.236129  | -5.664805  | 0.000000  |
| Si | -18.001965 | -8.003448  | 0.000000  | H  | 16.971630  | -12.630218 | 0.000000  |
| Si | -15.523929 | -15.558625 | 0.000000  | H  | 22.377081  | -6.588460  | 0.000000  |
| H  | -19.423905 | -8.382754  | 0.000000  | H  | 21.607601  | -4.244525  | 0.000000  |
| H  | -16.894314 | -16.084891 | 0.000000  | Si | 13.743905  | -12.340194 | 0.000000  |
| H  | -14.479667 | -16.590469 | 0.000000  | C  | 13.393876  | -13.961100 | 0.715618  |
| Si | -17.558874 | -5.732474  | 0.000000  | C  | 13.393876  | -13.961100 | -0.715618 |
| C  | -18.787605 | -4.618887  | 0.715618  | H  | 12.706205  | -11.296508 | 0.000000  |
| C  | -18.787605 | -4.618887  | -0.715618 | B  | 13.119997  | -15.225187 | 0.000000  |
| H  | -16.136166 | -5.355642  | 0.000000  | B  | 12.779097  | -16.830170 | 0.000000  |
| B  | -19.745397 | -3.749657  | 0.000000  | B  | 11.218557  | -17.337134 | 0.000000  |
| B  | -20.964903 | -2.651937  | 0.000000  | B  | 13.997960  | -17.928124 | 0.000000  |
| B  | -20.623677 | -1.046988  | 0.000000  | C  | 9.986720   | -17.731279 | 0.715609  |
| B  | -22.525190 | -3.158527  | 0.000000  | C  | 9.986720   | -17.731279 | -0.715609 |
| C  | -20.349098 | 0.216886   | 0.715609  | C  | 14.956376  | -18.790768 | 0.718229  |
| C  | -20.349098 | 0.216886   | -0.715609 | C  | 14.956376  | -18.790768 | -0.718229 |
| C  | -23.751470 | -3.557218  | 0.718229  | Si | 8.408651   | -18.240320 | 0.000000  |
| C  | -23.751470 | -3.557218  | -0.718229 | Si | 16.180790  | -19.896791 | 0.000000  |
| Si | -20.000906 | 1.838055   | 0.000000  | H  | 8.023420   | -19.660688 | 0.000000  |
| Si | -25.321521 | -4.064580  | 0.000000  | H  | 15.944952  | -21.345746 | 0.000000  |
| H  | -21.038365 | 2.881858   | 0.000000  | H  | 17.598237  | -19.514830 | 0.000000  |
| H  | -26.458434 | -3.135861  | 0.000000  | Si | 6.664208   | -16.719960 | 0.000000  |
| H  | -25.699457 | -5.483105  | 0.000000  | C  | 5.085423   | -17.227663 | 0.715632  |
| Si | -17.812014 | 2.588606   | 0.000000  | C  | 5.085423   | -17.227663 | -0.715632 |
| C  | -17.462305 | 4.209726   | 0.715632  | H  | 7.048344   | -15.299230 | 0.000000  |
| C  | -17.462305 | 4.209726   | -0.715632 | B  | 3.854400   | -17.624163 | 0.000000  |
| H  | -16.773694 | 1.545570   | 0.000000  | B  | 2.295384   | -18.135890 | 0.000000  |
| B  | -17.190173 | 5.474073   | 0.000000  | B  | 1.071528   | -17.042940 | 0.000000  |

|    |           |            |           |
|----|-----------|------------|-----------|
| B  | 1.961688  | -19.741988 | 0.000000  |
| C  | 0.109989  | -16.177696 | 0.715576  |
| C  | 0.109989  | -16.177696 | -0.715576 |
| C  | 1.701058  | -21.004799 | 0.718242  |
| C  | 1.701058  | -21.004799 | -0.718242 |
| Si | -1.126200 | -15.073088 | 0.000000  |
| Si | 1.365627  | -22.620401 | 0.000000  |
| H  | -2.547164 | -15.455696 | 0.000000  |
| H  | -0.003728 | -23.149526 | 0.000000  |
| H  | 2.412035  | -23.650052 | 0.000000  |
| B  | 8.185807  | 19.482108  | 0.000000  |
| B  | 8.527231  | 21.086651  | 0.000000  |
| C  | 8.795094  | 22.347985  | 0.718229  |
| C  | 8.795094  | 22.347985  | -0.718229 |
| Si | 9.140731  | 23.961370  | 0.000000  |
| H  | 10.513482 | 24.481606  | 0.000000  |
| H  | 8.101220  | 24.997935  | 0.000000  |
| B  | 9.405120  | 18.384123  | 0.000000  |
| C  | 10.362378 | 17.514393  | 0.715609  |
| C  | 10.362378 | 17.514393  | -0.715609 |
| Si | 11.592255 | 16.402265  | 0.000000  |
| H  | 13.014945 | 16.778830  | 0.000000  |
| B  | 6.625400  | 18.974844  | 0.000000  |
| C  | 5.393730  | 18.579987  | 0.715618  |
| C  | 5.393730  | 18.579987  | -0.715618 |
| Si | 3.814968  | 18.072668  | 0.000000  |
| H  | 3.429961  | 16.652151  | 0.000000  |
| Si | 11.147806 | 14.131354  | 0.000000  |
| C  | 12.376882 | 13.017937  | 0.715632  |
| C  | 12.376882 | 13.017937  | -0.715632 |
| H  | 9.725350  | 13.753660  | 0.000000  |
| B  | 13.335773 | 12.150090  | 0.000000  |
| B  | 14.558449 | 11.055806  | 0.000000  |
| B  | 14.223855 | 9.449441   | 0.000000  |
| B  | 16.116219 | 11.569866  | 0.000000  |
| C  | 13.955301 | 8.184101   | 0.715576  |
| C  | 13.955301 | 8.184101   | -0.715576 |
| C  | 17.340161 | 11.975560  | 0.718242  |
| C  | 17.340161 | 11.975560  | -0.718242 |
| Si | 13.616778 | 6.561226   | 0.000000  |
| Si | 18.907029 | 12.492868  | 0.000000  |
| H  | 14.658608 | 5.521940   | 0.000000  |
| H  | 19.275529 | 13.913909  | 0.000000  |
| Si | -3.239712 | 13.676842  | 0.000000  |
| C  | -2.899127 | 15.299394  | 0.715592  |
| C  | -2.899127 | 15.299394  | -0.715592 |
| H  | -2.198248 | 12.637126  | 0.000000  |
| B  | -2.631361 | 16.564966  | 0.000000  |
| B  | -2.297357 | 18.171570  | 0.000000  |

|    |           |           |           |
|----|-----------|-----------|-----------|
| B  | -0.738449 | 18.683396 | 0.000000  |
| B  | -3.520924 | 19.264130 | 0.000000  |
| C  | 0.492422  | 19.080195 | 0.715608  |
| C  | 0.492422  | 19.080195 | -0.715608 |
| C  | -4.483188 | 20.122411 | 0.718240  |
| C  | -4.483188 | 20.122411 | -0.718240 |
| Si | 2.069794  | 19.591883 | 0.000000  |
| Si | -5.712200 | 21.223430 | 0.000000  |
| H  | 2.452275  | 21.012972 | 0.000000  |
| H  | -5.482767 | 22.673351 | 0.000000  |
| H  | -7.127934 | 20.834994 | 0.000000  |
| H  | 20.049941 | 11.571534 | 0.000000  |

**COF-SiBHC-1**

E= -2395.85444

|    |           |           |           |
|----|-----------|-----------|-----------|
| B  | 0.672719  | 9.116830  | 0.000136  |
| C  | 0.900139  | 7.843963  | 0.715651  |
| C  | 0.900125  | 7.843997  | -0.715441 |
| Si | 1.187100  | 6.209934  | 0.000061  |
| H  | 2.539992  | 5.633137  | 0.000029  |
| Si | -0.561823 | 4.695770  | 0.000023  |
| C  | -0.274504 | 3.061744  | 0.715493  |
| C  | -0.274529 | 3.061803  | -0.715595 |
| H  | -1.914813 | 5.272338  | 0.000073  |
| B  | -0.046719 | 1.789002  | -0.000108 |
| B  | 0.258728  | 0.176694  | -0.000167 |
| B  | -0.977688 | -0.901969 | -0.000133 |
| B  | 1.810978  | -0.356405 | -0.000138 |
| C  | -1.952085 | -1.752040 | 0.715362  |
| C  | -1.952142 | -1.751994 | -0.715600 |
| C  | 3.032442  | -0.780224 | 0.715403  |
| C  | 3.032440  | -0.780331 | -0.715618 |
| Si | -3.198502 | -2.846395 | -0.000105 |
| Si | 4.599687  | -1.323674 | -0.000069 |
| H  | -2.984181 | -4.302170 | -0.000158 |
| H  | 5.761174  | -0.419904 | -0.000132 |
| Si | -5.403338 | -2.145504 | 0.000000  |
| C  | -6.649871 | -3.239658 | 0.715525  |
| C  | -6.649946 | -3.239637 | -0.715433 |
| H  | -5.617295 | -0.689680 | 0.000033  |
| B  | -7.624571 | -4.089409 | 0.000088  |
| B  | -8.860818 | -5.167047 | 0.000155  |
| B  | 7.864954  | -4.555192 | 0.000157  |
| C  | 6.643577  | -4.131067 | 0.715650  |
| C  | 6.643569  | -4.131174 | -0.715388 |
| Si | 5.076374  | -3.587607 | 0.000099  |
| H  | 3.914733  | -4.491182 | 0.000164  |
| TV | 18.277674 | 0.078327  | 0.000025  |
| TV | 9.228694  | 15.896327 | 0.000009  |
